# Supplementary material
Source: publisher site journal article supplement (https://www.spandidos-publications.com/8404/downloadSupplementary)
Supplement: Supplementary file 1 [file downloadSupplementary]

## Sheet: Sheet1
Table SIII. Mitochondrial autophagy pathway enrichment score.
GOBP_MITOPHAGY	GOBP_PARKIN_MEDIATED_STIMULATION_OF_MITOPHAGY_IN_RESPONSE_TO_MITOCHONDRIAL_DEPOLARIZATION	GOBP_POSITIVE_REGULATION_OF_MITOPHAGY	GOBP_POSITIVE_REGULATION_OF_MITOPHAGY_IN_RESPONSE_TO_MITOCHONDRIAL_DEPOLARIZATION	GOBP_REGULATION_OF_MITOPHAGY	REACTOME_MITOPHAGY	REACTOME_PINK1_PRKN_MEDIATED_MITOPHAGY	REACTOME_RECEPTOR_MEDIATED_MITOPHAGY
0.325609	0.431348	0.506589	0.407869	0.440073	0.420863	0.41543	0.363
0.367292	0.408516	0.519871	0.41499	0.441721	0.585934	0.573311	0.702705
0.45634	0.550494	0.565958	0.550533	0.530505	0.44261	0.424135	0.514146
0.378119	0.627724	0.523172	0.569087	0.436033	0.409859	0.487942	0.357352
0.506844	0.521813	0.508439	0.518712	0.45284	0.535362	0.502329	0.592067
0.536652	0.854598	0.67858	0.714602	0.590087	0.551512	0.554435	0.629384
0.477559	0.848526	0.582894	0.672091	0.503486	0.35454	0.358347	0.372765
0.430587	0.548211	0.768039	0.449502	0.648832	0.444844	0.51269	0.456312
0.463548	0.528702	0.619764	0.526643	0.458947	0.559023	0.536266	0.715728
0.672963	0.864438	0.722808	0.863288	0.685316	0.740281	0.733781	0.717941
0.458539	0.774453	0.55927	0.675658	0.470857	0.443414	0.437725	0.485328
0.603441	0.756812	0.561861	0.642112	0.679956	0.461239	0.401508	0.505572
0.384592	0.762744	0.403336	0.643148	0.428056	0.434943	0.430131	0.50036
0.602117	0.547033	0.79524	0.590296	0.637528	0.566934	0.586723	0.679515
0.522237	0.562893	0.551197	0.564022	0.506856	0.485278	0.548904	0.406624
0.302338	0.479776	0.549747	0.44176	0.337545	0.581554	0.547951	0.790744
0.591861	0.67117	0.609959	0.550581	0.515658	0.658571	0.713309	0.687215
0.49219	0.601717	0.557604	0.509811	0.577898	0.443239	0.537161	0.454125
0.43713	0.705745	0.525829	0.60427	0.479919	0.4361	0.454152	0.471867
0.52735	0.705709	0.510799	0.59693	0.539337	0.587075	0.559292	0.722769
0.53254	0.677573	0.773416	0.641769	0.577553	0.568855	0.626963	0.583501
0.546128	0.807593	0.624579	0.563654	0.5695	0.404125	0.393623	0.509127
0.438608	0.478582	0.528598	0.444816	0.52105	0.465785	0.465496	0.541221
0.537927	0.521918	0.666862	0.602597	0.612922	0.665422	0.60236	0.711853
0.496355	0.509913	0.500812	0.585496	0.538929	0.3897	0.425369	0.470378
0.462351	0.488731	0.630142	0.482186	0.535461	0.555758	0.462712	0.604996
0.541641	0.620598	0.560624	0.520087	0.578085	0.452824	0.422524	0.546481
0.347491	0.566123	0.560418	0.444756	0.464927	0.375174	0.382504	0.441733
0.593077	0.811579	0.564773	0.688066	0.545701	0.613786	0.553537	0.697908
0.418125	0.59016	0.561361	0.560645	0.441933	0.462587	0.468466	0.552053
0.665805	0.74663	0.548692	0.788063	0.627266	0.660063	0.598332	0.666113
0.464545	0.737597	0.59579	0.623495	0.468163	0.530655	0.608884	0.626702
0.451867	0.604656	0.50821	0.619361	0.461517	0.423743	0.472792	0.414713
0.394589	0.512196	0.492148	0.453823	0.406154	0.380037	0.424519	0.40529
0.356348	0.544482	0.488858	0.446669	0.478726	0.476116	0.509197	0.585329
0.403168	0.746425	0.371043	0.720242	0.412604	0.372522	0.384587	0.51743
0.414723	0.713453	0.545017	0.634502	0.386108	0.351743	0.397894	0.370851
0.449567	0.470623	0.714855	0.514414	0.52457	0.449225	0.507423	0.499108
0.489464	0.866768	0.518504	0.565185	0.45449	0.424918	0.571833	0.481626
0.4078	0.609044	0.357851	0.481139	0.365254	0.404046	0.369683	0.494537
0.379419	0.505709	0.591225	0.451299	0.432345	0.471659	0.428107	0.534794
0.424188	0.648807	0.408429	0.616073	0.475263	0.460906	0.455	0.428455
0.570501	0.645953	0.738591	0.587773	0.650765	0.612024	0.573451	0.745847
0.502367	0.700511	0.673397	0.627464	0.455478	0.422231	0.37228	0.590454
0.408928	0.637395	0.461584	0.590361	0.424232	0.408943	0.416215	0.462653
0.560521	0.710056	0.687277	0.630018	0.66677	0.687698	0.662512	0.776241
0.500012	0.511938	0.413391	0.5692	0.474893	0.318027	0.39602	0.503086
0.614718	0.789822	0.685925	0.706374	0.589291	0.508634	0.57044	0.477568
0.463926	0.623071	0.513831	0.623114	0.482857	0.449038	0.417004	0.456115
0.462973	0.574497	0.747549	0.523699	0.633617	0.490151	0.486925	0.523718
0.382316	0.397073	0.462101	0.430485	0.457732	0.400999	0.503476	0.474054
0.426118	0.564505	0.567983	0.576824	0.514205	0.493801	0.532214	0.539047
0.539953	0.775107	0.541981	0.694148	0.563662	0.658162	0.66898	0.55319
0.377909	0.609138	0.547517	0.341266	0.506594	0.342085	0.36957	0.390406
0.421053	0.689963	0.427687	0.713837	0.431394	0.531178	0.49831	0.604128
0.295473	0.539884	0.486889	0.424241	0.418382	0.345626	0.305731	0.507695
0.482735	0.723551	0.691628	0.583861	0.49711	0.577828	0.422042	0.585714
0.47144	0.510328	0.547452	0.506472	0.475061	0.484726	0.449354	0.582894
0.372287	0.595267	0.45149	0.479984	0.451761	0.505663	0.489981	0.574542
0.494715	0.574607	0.646977	0.619083	0.499917	0.420516	0.528245	0.459807
0.451715	0.632744	0.575977	0.626745	0.550766	0.457897	0.452368	0.571356
0.41773	0.699545	0.599718	0.578473	0.617612	0.450313	0.441203	0.443246
0.443445	0.583543	0.561652	0.578405	0.502178	0.417997	0.406024	0.475375
0.563821	0.741444	0.684168	0.659193	0.639887	0.512294	0.538133	0.520919
0.537406	0.655329	0.550462	0.626155	0.577501	0.562682	0.585829	0.582948
0.624308	0.816501	0.601748	0.731086	0.610293	0.552638	0.61065	0.652072
0.687749	0.702074	0.649326	0.656834	0.631061	0.561417	0.599121	0.597023
0.549818	0.542364	0.674791	0.547085	0.604814	0.370719	0.341765	0.432785
0.535146	0.671707	0.658703	0.637472	0.529709	0.586703	0.547684	0.643776
0.417111	0.703082	0.563995	0.574648	0.487108	0.503909	0.554794	0.51276
0.395218	0.637382	0.510747	0.498071	0.412593	0.393259	0.301549	0.493009
0.469212	0.753956	0.592821	0.663808	0.555458	0.471178	0.522161	0.712081
0.457643	0.622368	0.584599	0.565538	0.509449	0.476006	0.476849	0.537133
0.517414	0.589766	0.767352	0.649948	0.551966	0.585936	0.50781	0.751895
0.388402	0.479556	0.482473	0.518399	0.398064	0.540038	0.448672	0.595379
0.41881	0.747329	0.555508	0.48166	0.340381	0.322946	0.337517	0.423587
0.385881	0.54036	0.464473	0.578564	0.399129	0.540333	0.543611	0.525794
0.653363	0.795029	0.600563	0.784015	0.646021	0.611665	0.660273	0.607526
0.486942	0.711769	0.504112	0.656523	0.471696	0.550099	0.555787	0.651198
0.505367	0.665731	0.625873	0.572542	0.558292	0.387622	0.429312	0.392733
0.370396	0.410487	0.451953	0.421348	0.442447	0.381628	0.369552	0.467546
0.406908	0.44098	0.587618	0.461293	0.55184	0.463039	0.471191	0.641726
0.441131	0.755371	0.547481	0.577189	0.51606	0.536805	0.502439	0.566418
0.388808	0.763622	0.499717	0.684513	0.40993	0.493266	0.442608	0.5769
0.487451	0.635305	0.636007	0.577	0.561732	0.570053	0.50335	0.622544
0.472975	0.507034	0.554036	0.496249	0.443281	0.500869	0.461443	0.538781
0.451917	0.806153	0.554749	0.66515	0.538584	0.476403	0.513341	0.739851
0.418379	0.52879	0.44328	0.465444	0.476618	0.432324	0.396561	0.524825
0.571828	0.79523	0.646758	0.805649	0.526147	0.719021	0.713805	0.693222
0.541274	0.612471	0.635631	0.674803	0.564073	0.703056	0.644392	0.676878
0.475517	0.602964	0.523654	0.591381	0.542139	0.41014	0.415024	0.507114
0.498827	0.570311	0.572529	0.546563	0.447896	0.547109	0.441221	0.665787
0.442875	0.691823	0.543802	0.544577	0.457517	0.399751	0.391338	0.5385
0.513448	0.775287	0.479705	0.61346	0.43471	0.478575	0.559869	0.536346
0.526163	0.778705	0.572395	0.728414	0.440787	0.53204	0.6143	0.622028
0.431805	0.633637	0.526804	0.584737	0.39174	0.466773	0.572481	0.422932
0.448189	0.72068	0.537614	0.583857	0.470831	0.410077	0.426748	0.405888
0.491103	0.642361	0.57711	0.541363	0.437752	0.369368	0.418817	0.423992
0.377269	0.613426	0.556519	0.577427	0.506806	0.404715	0.404677	0.460516
0.516916	0.800382	0.551534	0.67758	0.620785	0.5614	0.587798	0.573685
0.486294	0.567192	0.587982	0.59074	0.574393	0.528385	0.494733	0.574254
0.545589	0.892461	0.529987	0.696405	0.588795	0.531035	0.587428	0.652325
0.432933	0.593956	0.527056	0.527879	0.579176	0.547919	0.506403	0.701064
0.398393	0.404534	0.43991	0.433442	0.380481	0.387351	0.352461	0.486013
0.470058	0.379441	0.441346	0.422003	0.438364	0.493865	0.523162	0.586886
0.486824	0.644329	0.466965	0.593879	0.397048	0.53629	0.474798	0.677674
0.387882	0.729357	0.431834	0.587367	0.435947	0.386245	0.381696	0.375073
0.470934	0.55521	0.597335	0.476009	0.450561	0.448658	0.395203	0.579656
0.379765	0.560955	0.605033	0.553198	0.457762	0.515475	0.490104	0.529131
0.44665	0.558499	0.598968	0.442115	0.486913	0.417339	0.405882	0.489787
0.494983	0.400954	0.569514	0.586954	0.555846	0.455597	0.479571	0.424012
0.512687	0.764904	0.639248	0.763887	0.493533	0.548769	0.521778	0.643984
0.438546	0.567571	0.68181	0.534733	0.531781	0.483077	0.462621	0.524919
0.449136	0.50174	0.619217	0.499377	0.534693	0.435262	0.430551	0.58944
0.372719	0.546966	0.653227	0.392245	0.554696	0.31383	0.393387	0.405054
0.340431	0.575212	0.515411	0.447903	0.462333	0.402912	0.429109	0.48655
0.440881	0.802062	0.702383	0.648441	0.544044	0.646253	0.626943	0.728333
0.357699	0.462817	0.422403	0.559296	0.372884	0.587697	0.627082	0.611941
0.510175	0.595294	0.586935	0.488203	0.605926	0.483568	0.467361	0.585674
0.464107	0.709293	0.344447	0.566234	0.529593	0.359405	0.461568	0.403719
0.4203	0.67403	0.61303	0.495553	0.470625	0.345451	0.392258	0.440343
0.492388	0.664647	0.665698	0.567531	0.466723	0.462265	0.468184	0.531311
0.562305	0.735983	0.638092	0.670232	0.657151	0.551718	0.567321	0.679626
0.498001	0.435701	0.538331	0.396193	0.515858	0.457313	0.42662	0.488647
0.437323	0.614368	0.520818	0.607528	0.461095	0.435126	0.419882	0.543382
0.539112	0.462448	0.698219	0.462568	0.695453	0.44266	0.395	0.463145
0.4548	0.571007	0.564094	0.537835	0.482065	0.465611	0.443073	0.618086
0.601559	0.654644	0.693511	0.647173	0.704293	0.486528	0.500583	0.448517
0.359785	0.522837	0.488437	0.496286	0.319748	0.36538	0.433005	0.460981
0.493494	0.710099	0.510071	0.710149	0.550608	0.442742	0.444991	0.558969
0.548407	0.761198	0.581424	0.671683	0.609717	0.618751	0.613708	0.726065
0.468366	0.64173	0.591845	0.574755	0.564022	0.399277	0.429613	0.398455
0.37375	0.56218	0.527051	0.467093	0.454239	0.402763	0.41779	0.513287
0.628672	0.848591	0.574696	0.715526	0.597851	0.724423	0.728127	0.769318
0.412031	0.642173	0.418024	0.527964	0.429269	0.397945	0.362411	0.590092
0.457852	0.731154	0.588041	0.642553	0.525182	0.496209	0.475061	0.455714
0.420678	0.740321	0.644523	0.568062	0.527369	0.543375	0.478931	0.693525
0.342176	0.504564	0.399762	0.418716	0.361756	0.344497	0.41591	0.527868
0.520401	0.583232	0.667374	0.550817	0.584284	0.690113	0.657928	0.724088
0.438443	0.511317	0.626822	0.555117	0.467743	0.503808	0.50459	0.587015
0.425433	0.62279	0.470896	0.50331	0.412535	0.396155	0.44652	0.411196
0.495661	0.625312	0.569233	0.606158	0.45051	0.522937	0.520765	0.599083
0.398724	0.662309	0.520643	0.591747	0.492072	0.556653	0.501664	0.611527
0.442204	0.618486	0.481061	0.61265	0.516782	0.395206	0.425689	0.461733
0.463868	0.440472	0.489472	0.427918	0.444195	0.368886	0.342919	0.515289
0.499918	0.476803	0.47351	0.502948	0.575921	0.496475	0.607159	0.613343
0.436543	0.518136	0.539652	0.472048	0.489289	0.254075	0.27261	0.368745
0.722988	0.787467	0.746685	0.811575	0.710986	0.695591	0.684605	0.787925
0.461444	0.68247	0.636562	0.611492	0.496574	0.478095	0.539397	0.553277
0.43996	0.586905	0.522676	0.591515	0.597445	0.339925	0.301141	0.376199
0.659989	0.752742	0.687035	0.71459	0.696893	0.680276	0.69469	0.676399
0.30783	0.5531	0.487874	0.415521	0.344025	0.429325	0.467298	0.530314
0.413396	0.563366	0.609303	0.563406	0.450619	0.472092	0.373077	0.622382
0.392948	0.482701	0.502617	0.429729	0.480961	0.327919	0.327754	0.410431
0.643262	0.755444	0.740006	0.783095	0.666871	0.634204	0.681156	0.612867
0.339447	0.451921	0.66251	0.405827	0.454677	0.353292	0.342868	0.442061
0.533387	0.564875	0.569495	0.623794	0.568732	0.518158	0.519491	0.565067
0.464561	0.557614	0.673431	0.467195	0.533539	0.508047	0.519279	0.585316
0.493121	0.610041	0.438072	0.651129	0.527407	0.539244	0.592186	0.544145
0.347678	0.654445	0.582984	0.411014	0.438805	0.399852	0.32569	0.512352
0.429425	0.591818	0.635151	0.416891	0.459559	0.333875	0.37142	0.45946
0.405857	0.879642	0.44488	0.657513	0.395178	0.437893	0.447169	0.546879
0.461652	0.524836	0.46435	0.436565	0.489365	0.430387	0.487404	0.485645
0.385915	0.530366	0.489257	0.525955	0.412452	0.499427	0.582792	0.554038
0.399979	0.583123	0.398191	0.491497	0.465339	0.359669	0.423266	0.338466
0.471834	0.605829	0.612673	0.582392	0.50229	0.485836	0.445383	0.555602
0.499557	0.704516	0.5031	0.651314	0.458491	0.574498	0.529814	0.580892
0.55209	0.69103	0.646531	0.699503	0.446815	0.532084	0.611969	0.589479
0.43558	0.828945	0.613266	0.681898	0.455992	0.454175	0.505072	0.434311
0.473444	0.598206	0.615565	0.571248	0.610436	0.481493	0.482125	0.578989
0.474028	0.601574	0.619018	0.437856	0.506443	0.415434	0.462979	0.494163
0.476809	0.531424	0.637941	0.513377	0.559311	0.464756	0.390566	0.567725
0.570811	0.689659	0.642171	0.610278	0.595255	0.480915	0.470032	0.598829
0.429274	0.491584	0.591602	0.467473	0.476598	0.481169	0.489053	0.528202
0.586247	0.688605	0.589099	0.665069	0.531361	0.493892	0.520707	0.561692
0.548464	0.464649	0.500529	0.556982	0.498666	0.58171	0.598287	0.603997
0.379926	0.435927	0.621661	0.32958	0.401637	0.38747	0.399003	0.551832
0.315962	0.535178	0.516762	0.557341	0.41524	0.418715	0.463747	0.52169
0.516393	0.730065	0.761975	0.651381	0.587908	0.468592	0.470021	0.494011
0.497065	0.75763	0.463099	0.556821	0.463768	0.509166	0.520261	0.46234
0.4834	0.665606	0.722528	0.637895	0.551096	0.471889	0.457112	0.5995
0.424176	0.495566	0.583728	0.466173	0.544647	0.413078	0.484363	0.499596
0.690723	0.681053	0.676407	0.726916	0.659844	0.727769	0.702209	0.69461
0.33737	0.50937	0.611564	0.354003	0.302807	0.323858	0.296673	0.503307
0.501409	0.632954	0.477369	0.652596	0.486428	0.444529	0.436761	0.464593
0.416211	0.421602	0.50742	0.460633	0.466321	0.475192	0.478957	0.582702
0.344918	0.586829	0.488869	0.514075	0.466138	0.462347	0.497174	0.609436
0.402606	0.717545	0.532896	0.621293	0.37455	0.459348	0.405935	0.544405
0.479508	0.444054	0.418244	0.458997	0.484579	0.438305	0.4478	0.521311
0.49621	0.602096	0.718416	0.482145	0.516371	0.371464	0.471496	0.44477
0.482923	0.622986	0.63336	0.53418	0.546955	0.440685	0.427625	0.341041
0.410461	0.660739	0.424645	0.741237	0.448609	0.474083	0.482305	0.591929
0.409728	0.642089	0.495661	0.595866	0.48882	0.436392	0.466593	0.543094
0.541068	0.770318	0.606238	0.579065	0.595522	0.521911	0.525095	0.641893
0.466784	0.633737	0.600899	0.543432	0.504008	0.467661	0.476323	0.651668
0.320459	0.709448	0.441386	0.575556	0.387406	0.383605	0.313703	0.522847
0.679931	0.77907	0.610012	0.781748	0.604277	0.846826	0.802212	0.858093
0.40458	0.648724	0.363327	0.61191	0.384894	0.530077	0.512025	0.53212
0.498258	0.617334	0.489946	0.657434	0.491731	0.565349	0.525319	0.570964
0.422288	0.684235	0.440259	0.526329	0.557614	0.486389	0.465698	0.513363
0.543977	0.58595	0.695899	0.486839	0.631219	0.44015	0.507265	0.565102
0.530553	0.679607	0.713715	0.619612	0.625015	0.615097	0.59756	0.663012
0.426335	0.625008	0.591611	0.620522	0.561714	0.490675	0.477322	0.5462
0.506403	0.562561	0.605894	0.539337	0.588969	0.549301	0.48009	0.675126
0.53879	0.799076	0.681517	0.621517	0.617465	0.483256	0.455613	0.543787
0.458139	0.681864	0.500186	0.530495	0.484465	0.407043	0.409615	0.429628
0.403345	0.477005	0.560223	0.486869	0.426659	0.521525	0.516753	0.456533
0.255571	0.555387	0.472114	0.483924	0.395642	0.403505	0.446197	0.437984
0.488203	0.564821	0.627192	0.64972	0.501267	0.448137	0.460527	0.522386
0.421902	0.530397	0.547644	0.44932	0.495067	0.490523	0.50023	0.46117
0.448072	0.734648	0.374203	0.6215	0.495072	0.367068	0.411643	0.454365
0.534458	0.67063	0.685436	0.591827	0.510552	0.553431	0.535807	0.621574
0.456701	0.606834	0.745821	0.535493	0.481272	0.512487	0.479054	0.554589
0.375683	0.609707	0.46794	0.586899	0.428664	0.404545	0.38145	0.571792
0.506533	0.443841	0.764154	0.397754	0.513739	0.511741	0.418641	0.641886
0.455778	0.584403	0.431018	0.553044	0.542935	0.536586	0.547138	0.653396
0.385224	0.410971	0.546498	0.416703	0.479372	0.515703	0.458622	0.582301
0.490084	0.705818	0.674349	0.501875	0.497668	0.435673	0.507296	0.676394
0.496527	0.589367	0.573747	0.511968	0.536988	0.541217	0.539409	0.669879
0.348884	0.460801	0.441777	0.372089	0.343907	0.393666	0.311839	0.544119
0.392742	0.428837	0.580775	0.44216	0.419269	0.467438	0.482251	0.526328
0.486248	0.61575	0.579512	0.575895	0.537428	0.478482	0.482812	0.539059
0.465977	0.618596	0.544522	0.577304	0.489801	0.491275	0.447773	0.672452
0.41124	0.68202	0.421849	0.689698	0.452987	0.43293	0.402033	0.50039
0.592568	0.505566	0.627856	0.583749	0.534469	0.675584	0.646779	0.782142
0.510067	0.606494	0.743746	0.650625	0.586195	0.715465	0.647549	0.760659
0.627328	0.7103	0.640035	0.691954	0.559664	0.725917	0.678297	0.783165
0.45269	0.447168	0.569342	0.455391	0.567577	0.467471	0.507331	0.46182
0.433094	0.695256	0.585585	0.53438	0.536613	0.490116	0.547106	0.553015
0.457795	0.735684	0.563263	0.566455	0.510388	0.432408	0.491483	0.443024
0.496522	0.665892	0.537255	0.735493	0.535339	0.570501	0.48697	0.642911
0.54063	0.656964	0.551021	0.60391	0.518402	0.557622	0.561695	0.609751
0.411966	0.371691	0.383708	0.370177	0.39918	0.456916	0.437149	0.5704
0.536208	0.619892	0.726386	0.568293	0.611333	0.437251	0.425646	0.448161
0.469512	0.610217	0.600904	0.522983	0.495692	0.576232	0.550413	0.675371
0.472008	0.5602	0.723059	0.541608	0.459385	0.49119	0.406058	0.527331
0.465031	0.780515	0.60022	0.713046	0.536982	0.521229	0.460006	0.533661
0.403884	0.740109	0.587788	0.643099	0.466519	0.500344	0.47176	0.552066
0.542345	0.82525	0.60898	0.712016	0.630894	0.560131	0.519408	0.576372
0.360997	0.741634	0.491806	0.536653	0.441423	0.370615	0.410085	0.467954
0.374762	0.58751	0.510062	0.559288	0.509192	0.485596	0.513875	0.362806
0.423379	0.452584	0.539232	0.438601	0.512582	0.336441	0.356503	0.552369
0.425644	0.571016	0.476297	0.511249	0.448346	0.483729	0.472994	0.477642
0.400922	0.88412	0.418851	0.677286	0.363924	0.457812	0.428483	0.443413
0.408494	0.575181	0.620409	0.487333	0.536531	0.330534	0.349015	0.367271
0.40926	0.524978	0.592743	0.419588	0.521461	0.416685	0.408053	0.562231
0.346149	0.544945	0.767233	0.435029	0.447761	0.505653	0.486339	0.571447
0.44905	0.605523	0.612427	0.535126	0.531855	0.569894	0.597695	0.620826
0.398272	0.436047	0.557538	0.412965	0.520036	0.401538	0.387969	0.438046
0.443884	0.58901	0.653337	0.567296	0.437015	0.459978	0.447424	0.49065
0.499349	0.453784	0.631863	0.475189	0.499915	0.651797	0.638013	0.661137
0.506735	0.612375	0.638526	0.606459	0.608332	0.488896	0.515116	0.487261
0.41958	0.529331	0.494444	0.521657	0.439629	0.401574	0.411055	0.575928
0.489317	0.594578	0.630047	0.593491	0.549722	0.566808	0.559359	0.620088
0.394273	0.531003	0.467666	0.42444	0.365299	0.447634	0.430616	0.448343
0.336683	0.55693	0.617616	0.476698	0.471823	0.549792	0.478279	0.723697
0.42643	0.705298	0.51408	0.60614	0.470451	0.406644	0.385053	0.478218
0.466911	0.704954	0.604241	0.666824	0.442853	0.530338	0.456063	0.587139
0.445652	0.499341	0.623182	0.486345	0.527887	0.35498	0.435648	0.419675
0.402915	0.441048	0.461306	0.499449	0.443748	0.388973	0.367	0.485866
0.458215	0.53976	0.622653	0.457573	0.575479	0.486577	0.521643	0.590891
0.455312	0.62831	0.472885	0.584251	0.519395	0.478452	0.475586	0.579568
0.47817	0.652981	0.574159	0.62228	0.516339	0.551776	0.464664	0.578593
0.436246	0.465479	0.402992	0.471961	0.463397	0.453213	0.4536	0.595463
0.447185	0.708739	0.68229	0.63589	0.500882	0.40598	0.5393	0.466815
0.599547	0.63054	0.591948	0.665061	0.544157	0.501581	0.486662	0.549335
0.625624	0.892444	0.62097	0.735096	0.721566	0.559427	0.590948	0.534662
0.348066	0.447732	0.478223	0.509462	0.397818	0.539119	0.396583	0.651049
0.497418	0.606102	0.653815	0.50656	0.618798	0.43822	0.443819	0.458421
0.49378	0.52222	0.663633	0.487437	0.619809	0.579236	0.518141	0.650477
0.473849	0.727938	0.518451	0.685598	0.518305	0.4921	0.491817	0.568429
0.4732	0.553338	0.525282	0.540593	0.475515	0.556678	0.530719	0.571306
0.475577	0.625863	0.450951	0.627531	0.457111	0.601523	0.668487	0.592392
0.529002	0.481599	0.503667	0.503166	0.515263	0.430991	0.458112	0.44533
0.498466	0.635418	0.504488	0.584471	0.452956	0.524189	0.555663	0.542366
0.496034	0.669773	0.598125	0.66608	0.505844	0.428723	0.390877	0.566958
0.547096	0.720793	0.67261	0.59685	0.5666	0.521639	0.50965	0.742585
0.452208	0.597154	0.524625	0.459328	0.513437	0.408823	0.429785	0.465197
0.384701	0.618119	0.575169	0.608984	0.448425	0.392971	0.412592	0.456755
0.424179	0.672026	0.511922	0.552716	0.378398	0.407092	0.382176	0.514528
0.385236	0.412313	0.430437	0.488432	0.439547	0.472813	0.457223	0.689089
0.535723	0.673919	0.668905	0.525901	0.583098	0.560378	0.543123	0.648116
0.516201	0.681862	0.635204	0.60786	0.60111	0.552883	0.547075	0.658767
0.360938	0.473786	0.687748	0.380682	0.560067	0.460107	0.421715	0.485172
0.403159	0.567095	0.384357	0.514111	0.404293	0.410861	0.460717	0.450731
0.467408	0.509026	0.641671	0.468855	0.501094	0.514953	0.484594	0.570365
0.554664	0.656437	0.637946	0.54251	0.605177	0.48386	0.478979	0.539416
0.33863	0.5632	0.565765	0.536472	0.509799	0.426387	0.392834	0.543989
0.584037	0.45788	0.468849	0.519969	0.505696	0.546435	0.622625	0.620487
0.384279	0.609971	0.349839	0.626261	0.480633	0.39251	0.440381	0.353623
0.523321	0.533426	0.581336	0.502682	0.674041	0.502647	0.49636	0.551068
0.520565	0.610006	0.596054	0.565791	0.50056	0.400895	0.428111	0.459729
0.544627	0.799094	0.653543	0.649453	0.653635	0.533353	0.58527	0.532482
0.412091	0.669083	0.618821	0.56441	0.487907	0.361189	0.323782	0.448014
0.329164	0.748415	0.570799	0.549233	0.432621	0.33772	0.424597	0.335622
0.406158	0.606326	0.641426	0.468006	0.451366	0.418943	0.362786	0.367243
0.371378	0.404007	0.525349	0.369234	0.534828	0.32055	0.406689	0.33964
0.478014	0.560398	0.638546	0.560438	0.537907	0.434338	0.468734	0.501778
0.406437	0.720072	0.694538	0.590554	0.498733	0.351128	0.329746	0.426029
0.457427	0.458141	0.4711	0.518938	0.515183	0.594019	0.554568	0.676513
0.390875	0.539491	0.642126	0.504708	0.523103	0.461407	0.377501	0.481826
0.376169	0.574849	0.522322	0.499007	0.356152	0.431956	0.390603	0.554016
0.474212	0.48775	0.702347	0.483105	0.615189	0.496592	0.494188	0.480754
0.435661	0.756977	0.56562	0.571794	0.452762	0.412786	0.382389	0.491985
0.434701	0.775989	0.560389	0.534908	0.487181	0.381808	0.436201	0.443842
0.425635	0.55571	0.421969	0.612394	0.484552	0.450551	0.451451	0.526962
0.427535	0.629235	0.566663	0.508523	0.574015	0.424123	0.521683	0.520371
0.382114	0.552954	0.657336	0.60983	0.536864	0.445014	0.443437	0.468284
0.431658	0.571827	0.668825	0.543256	0.548944	0.336287	0.328149	0.405738
0.485466	0.646085	0.571383	0.56633	0.528015	0.468613	0.550311	0.484041
0.437868	0.519873	0.550971	0.529006	0.494138	0.454913	0.43675	0.567182
0.374389	0.467203	0.526705	0.490619	0.426668	0.476542	0.480812	0.514285
0.509081	0.61599	0.667949	0.608959	0.411903	0.561186	0.498141	0.575782
0.352067	0.381808	0.463282	0.469464	0.422262	0.404867	0.424397	0.413456
0.502703	0.642521	0.583117	0.513305	0.487602	0.548417	0.526425	0.723602
0.432351	0.575569	0.658301	0.463148	0.490251	0.41978	0.385397	0.483312
0.287708	0.448691	0.626522	0.423699	0.439353	0.568556	0.579558	0.575684
0.513548	0.695044	0.578042	0.55808	0.556271	0.519658	0.539673	0.675252
0.498791	0.7337	0.46402	0.66594	0.507137	0.453919	0.447582	0.510445
0.470731	0.572311	0.668196	0.537214	0.429304	0.454114	0.43586	0.521073
0.361872	0.589101	0.44406	0.576141	0.395884	0.471686	0.480218	0.487989
0.424957	0.508367	0.701679	0.457207	0.580905	0.4382	0.432688	0.552743
0.503828	0.818433	0.669732	0.644947	0.580657	0.533711	0.63931	0.642516
0.376131	0.558704	0.410176	0.499087	0.451629	0.386468	0.383866	0.470952
0.500012	0.508033	0.464308	0.538839	0.575546	0.416464	0.414875	0.53629
0.335209	0.590668	0.432297	0.47101	0.430069	0.427753	0.418112	0.721189
0.461611	0.477299	0.522412	0.504685	0.537226	0.469576	0.516579	0.438386
0.523877	0.588306	0.42956	0.579344	0.52609	0.464706	0.516352	0.520863
0.488906	0.696995	0.516358	0.692573	0.52111	0.439119	0.509958	0.445629
0.41746	0.635358	0.565473	0.543746	0.491395	0.413949	0.405625	0.582658
0.726901	0.855227	0.736655	0.75936	0.77399	0.687934	0.774923	0.716689
0.388252	0.596977	0.650924	0.406917	0.348132	0.37176	0.417839	0.572445
0.444305	0.655557	0.543587	0.561855	0.50866	0.344327	0.393274	0.514857
0.488845	0.747678	0.502566	0.681487	0.499351	0.571215	0.58848	0.551749
0.496738	0.674596	0.538309	0.669396	0.542913	0.547061	0.462257	0.564624
0.538542	0.798956	0.433476	0.684199	0.555006	0.544958	0.511672	0.606657
0.488399	0.647163	0.625141	0.635161	0.615371	0.48036	0.452385	0.531677
0.437567	0.587142	0.492143	0.526219	0.436374	0.429682	0.464327	0.627817
0.467453	0.559723	0.537883	0.574167	0.556059	0.516394	0.436078	0.554493
0.516046	0.501816	0.51689	0.514101	0.517412	0.423175	0.417458	0.635233
0.416682	0.711515	0.48482	0.522465	0.489281	0.349381	0.332014	0.43673
0.428095	0.495779	0.494684	0.454021	0.445321	0.481602	0.350207	0.478803
0.436477	0.663319	0.593542	0.602663	0.458438	0.416522	0.398882	0.470682
0.382991	0.449626	0.616455	0.472629	0.479654	0.517409	0.507701	0.500523
0.394231	0.779251	0.592326	0.671189	0.444488	0.627858	0.555561	0.718193
0.521398	0.651664	0.586906	0.591587	0.594142	0.512023	0.455904	0.498572
0.398481	0.738942	0.489077	0.628093	0.405456	0.556224	0.540411	0.682959
0.486218	0.584122	0.646017	0.545967	0.535457	0.368744	0.345225	0.448527
0.438191	0.662882	0.6657	0.685367	0.480552	0.439781	0.469994	0.425155
0.37178	0.428472	0.503632	0.456094	0.429431	0.337164	0.334338	0.478461
0.411423	0.695978	0.693565	0.532535	0.621422	0.454001	0.449892	0.504574
0.470085	0.612113	0.684057	0.540993	0.55029	0.475297	0.509825	0.500977
0.388136	0.684391	0.627689	0.60064	0.576344	0.409249	0.406776	0.481566
0.448278	0.68219	0.73396	0.653861	0.576109	0.410636	0.429764	0.452605
0.438503	0.542915	0.492905	0.482051	0.450356	0.460236	0.472592	0.491377
0.496303	0.508117	0.649819	0.553777	0.383285	0.547884	0.459256	0.660359
0.476288	0.892957	0.618034	0.758454	0.549103	0.464006	0.451694	0.47297
0.562453	0.720275	0.568571	0.667791	0.611796	0.591374	0.536526	0.683808
0.499882	0.597787	0.52761	0.575008	0.447017	0.394836	0.404934	0.392819
0.421422	0.490168	0.600727	0.526937	0.421544	0.455399	0.460752	0.480477
0.484193	0.505101	0.581192	0.50329	0.497965	0.482147	0.460481	0.413846
0.450617	0.734437	0.43223	0.549214	0.50579	0.495795	0.463041	0.630921
0.504774	0.618437	0.745402	0.552288	0.600966	0.525168	0.51864	0.573798
0.599652	0.824187	0.730284	0.694358	0.553098	0.498321	0.487589	0.601273
0.486354	0.599329	0.603332	0.611171	0.535179	0.575354	0.606177	0.586548
0.430685	0.616995	0.65905	0.565372	0.533646	0.390557	0.469001	0.414705
0.493252	0.815779	0.580086	0.62708	0.563136	0.49637	0.50986	0.535831
0.600901	0.678448	0.627239	0.659577	0.586666	0.542002	0.596749	0.541973
0.551149	0.753572	0.661461	0.598663	0.600235	0.618805	0.601721	0.553806
0.44428	0.47404	0.564216	0.501286	0.456762	0.481389	0.437265	0.579543
0.522654	0.683771	0.491464	0.557961	0.414524	0.397744	0.350886	0.557906
0.402299	0.762457	0.643635	0.618674	0.471801	0.451372	0.502826	0.561036
0.462553	0.576294	0.615173	0.497291	0.502522	0.499902	0.470492	0.589203
0.427488	0.595113	0.632218	0.533224	0.433223	0.449623	0.38476	0.527755
0.393215	0.465601	0.385588	0.502056	0.447425	0.439443	0.482378	0.626303
0.461004	0.565182	0.471605	0.545405	0.478615	0.385477	0.381181	0.496697
0.416711	0.542101	0.561946	0.461113	0.43784	0.515627	0.479133	0.586516
0.467954	0.621848	0.63103	0.621313	0.571257	0.514925	0.450803	0.658053
0.468483	0.55783	0.570972	0.478865	0.506879	0.443622	0.482359	0.460193
0.480057	0.655071	0.669392	0.634255	0.548714	0.332554	0.361336	0.400358
0.450253	0.592204	0.570135	0.534531	0.555648	0.513114	0.488836	0.473285
0.429422	0.583139	0.435009	0.560947	0.504225	0.486843	0.512301	0.450256
0.458887	0.645891	0.677355	0.558616	0.598253	0.387356	0.441326	0.356133
0.537781	0.6068	0.528922	0.545152	0.581894	0.524136	0.554646	0.571779
0.595803	0.761873	0.608402	0.743645	0.686516	0.523212	0.601685	0.534569
0.45113	0.753964	0.642511	0.681688	0.56444	0.32221	0.406351	0.366936
0.52374	0.665471	0.583423	0.537165	0.601227	0.522302	0.462579	0.667389
0.494343	0.659298	0.53225	0.594461	0.450583	0.5091	0.43839	0.530711
0.37469	0.690519	0.512303	0.687628	0.493614	0.376132	0.45335	0.437009
0.440203	0.583843	0.532778	0.559918	0.465656	0.541477	0.51888	0.635243
0.405685	0.440504	0.641951	0.355795	0.484514	0.414187	0.365156	0.468232
0.34139	0.367578	0.507802	0.470385	0.411253	0.470847	0.528957	0.496431
0.489541	0.724097	0.647212	0.663198	0.56251	0.559336	0.515343	0.597724
0.445542	0.564912	0.641933	0.462658	0.543229	0.498103	0.535444	0.636627
0.437322	0.515868	0.527717	0.556044	0.460277	0.583442	0.552776	0.684166
0.390567	0.37789	0.55428	0.439914	0.418327	0.359839	0.382222	0.483571
0.401267	0.525657	0.367299	0.470477	0.386034	0.443185	0.397775	0.538947
0.473594	0.729997	0.634489	0.586863	0.536338	0.466127	0.466808	0.531889
0.401595	0.485268	0.580074	0.54159	0.451543	0.559256	0.467483	0.662446
0.362496	0.583254	0.508741	0.455368	0.405739	0.346682	0.436414	0.338059
0.415216	0.542015	0.597508	0.542352	0.463023	0.469337	0.462559	0.581964
0.447974	0.727519	0.622419	0.617044	0.545801	0.484185	0.452394	0.563007
0.413734	0.642369	0.56486	0.59477	0.480481	0.50918	0.420749	0.625031
0.64079	0.725939	0.649995	0.806198	0.607587	0.546028	0.445229	0.65488
0.491465	0.623316	0.426375	0.574452	0.472033	0.480949	0.374582	0.440991
0.604119	0.832388	0.742105	0.769498	0.629106	0.689034	0.750999	0.71574
0.377292	0.56919	0.623866	0.442841	0.566932	0.428498	0.420478	0.399153
0.294521	0.636539	0.47712	0.472069	0.290509	0.456022	0.455272	0.493944
0.501554	0.601904	0.607818	0.537191	0.533172	0.55755	0.608521	0.542986
0.481965	0.509194	0.596546	0.416837	0.504573	0.430458	0.481917	0.496571
0.464186	0.596951	0.523454	0.522657	0.476848	0.471833	0.480495	0.483272
0.481457	0.795304	0.645219	0.670064	0.531027	0.562711	0.563109	0.497002
0.630034	0.81848	0.588217	0.81248	0.611826	0.638319	0.671571	0.730392
0.502438	0.609795	0.740965	0.523963	0.653547	0.410287	0.403759	0.546768
0.491395	0.517194	0.656507	0.48826	0.668606	0.501438	0.496192	0.516829
0.482412	0.663758	0.655449	0.579426	0.499883	0.490601	0.483174	0.521828
0.353837	0.661515	0.691572	0.517889	0.509955	0.43561	0.406332	0.36455
0.442287	0.562225	0.616917	0.518967	0.552665	0.472479	0.404578	0.577979
0.452884	0.460999	0.438377	0.373338	0.521773	0.455979	0.460563	0.559854
0.453375	0.565869	0.52438	0.506963	0.510367	0.401152	0.372657	0.453118
0.519504	0.655645	0.553477	0.655691	0.478705	0.545083	0.570496	0.493898
0.390536	0.555735	0.524869	0.535686	0.406489	0.548568	0.613026	0.614799
0.418762	0.598565	0.556467	0.50473	0.473793	0.517106	0.530248	0.568221
0.419087	0.62135	0.53962	0.47105	0.449165	0.387434	0.371443	0.585362
0.365685	0.562083	0.443485	0.450655	0.389445	0.426728	0.417556	0.524253
0.440408	0.706053	0.521963	0.628877	0.487939	0.458029	0.383941	0.621006
0.453755	0.650623	0.484768	0.606291	0.448705	0.564116	0.574535	0.66746
0.461107	0.566242	0.586706	0.558107	0.542807	0.467228	0.569617	0.502302
0.51263	0.530642	0.517031	0.494808	0.544954	0.585004	0.552194	0.732364
0.535761	0.760733	0.685057	0.658151	0.535855	0.43248	0.436881	0.534795
0.464853	0.533706	0.606328	0.482666	0.592146	0.341674	0.36995	0.265936
0.407089	0.583097	0.472869	0.499238	0.405601	0.324814	0.317635	0.53193
0.446196	0.559069	0.626164	0.461692	0.582869	0.514575	0.497952	0.577482
0.495013	0.63761	0.654403	0.595792	0.531346	0.463304	0.498127	0.55692
0.402974	0.701724	0.539153	0.580534	0.480216	0.49957	0.434498	0.635618
0.52363	0.668881	0.633771	0.637026	0.70513	0.651638	0.647171	0.697482
0.443156	0.677452	0.567987	0.563165	0.483415	0.463544	0.502808	0.512815
0.427882	0.566087	0.6086	0.638566	0.492652	0.521944	0.531647	0.531504
0.472575	0.596454	0.666833	0.477554	0.609241	0.372626	0.376028	0.507361
0.498737	0.600014	0.605602	0.475975	0.557222	0.377879	0.401575	0.342424
0.406807	0.614959	0.562964	0.483597	0.447842	0.421462	0.313107	0.687867
0.410813	0.668212	0.540426	0.56514	0.527195	0.501932	0.476577	0.623434
0.465449	0.599957	0.584848	0.578078	0.513772	0.611898	0.562614	0.59602
0.452839	0.639526	0.716559	0.636499	0.546002	0.537024	0.522485	0.597775
0.456566	0.613041	0.58402	0.492299	0.492413	0.377169	0.396645	0.555571
0.448315	0.647067	0.501665	0.52238	0.50224	0.435338	0.496513	0.499061
0.436012	0.611068	0.55955	0.387768	0.417054	0.567562	0.485096	0.604123
0.40457	0.522219	0.466205	0.386281	0.380407	0.414431	0.391826	0.584462
0.657776	0.63886	0.663546	0.674241	0.575253	0.795108	0.78574	0.772362
0.693653	0.642822	0.639119	0.731039	0.600246	0.777363	0.752244	0.810087
0.431526	0.682736	0.515344	0.590423	0.474263	0.323057	0.36129	0.352176
0.46956	0.718126	0.67509	0.526613	0.467946	0.443369	0.515026	0.534905
0.455827	0.523282	0.695929	0.581865	0.519919	0.51144	0.465383	0.590839
0.460779	0.552722	0.464274	0.617409	0.491153	0.453948	0.438736	0.46238
0.504167	0.585847	0.598666	0.578157	0.574538	0.503019	0.542631	0.657346
0.530644	0.849632	0.827729	0.722082	0.640043	0.493062	0.467494	0.629823
0.487911	0.515075	0.589918	0.51218	0.538665	0.53487	0.476255	0.619291
0.487734	0.647549	0.622987	0.506243	0.588746	0.605937	0.55952	0.736011
0.424814	0.528654	0.421152	0.572452	0.365419	0.474385	0.513054	0.390868
0.437476	0.729537	0.493084	0.660523	0.486174	0.45082	0.399872	0.364259
0.453415	0.451832	0.57127	0.418541	0.554202	0.4413	0.465235	0.605222
0.380691	0.476408	0.557136	0.399024	0.469671	0.562691	0.600724	0.532051
0.344761	0.43236	0.59361	0.453358	0.428636	0.392716	0.324221	0.518997
0.351278	0.553685	0.372519	0.603408	0.410625	0.387204	0.347976	0.528079
0.431004	0.569946	0.453087	0.5642	0.403539	0.597377	0.613813	0.626325
0.506679	0.566091	0.578574	0.603646	0.553885	0.477171	0.437336	0.538336
0.451228	0.546942	0.560073	0.398229	0.454139	0.441217	0.409121	0.359115
0.427334	0.633295	0.562192	0.548687	0.424399	0.522416	0.523809	0.644988
0.466997	0.618594	0.530788	0.62188	0.497122	0.639027	0.648419	0.753319
0.454228	0.533953	0.585902	0.464991	0.461027	0.431886	0.445627	0.436986
0.542664	0.575496	0.585701	0.686816	0.551804	0.505221	0.52964	0.545028
0.436177	0.719587	0.736372	0.54215	0.475173	0.629513	0.615387	0.626473
0.447579	0.50811	0.605553	0.510883	0.500858	0.371788	0.371943	0.503576
0.676529	0.797531	0.704815	0.719019	0.74735	0.618397	0.57798	0.705033
0.401412	0.576668	0.50982	0.469925	0.429068	0.388947	0.387788	0.49094
0.464363	0.622998	0.659022	0.531282	0.587442	0.541548	0.494969	0.697137
0.37278	0.554006	0.701215	0.507199	0.593859	0.489938	0.364751	0.636208
0.350055	0.517233	0.330898	0.500475	0.433475	0.534061	0.538831	0.563871
0.431614	0.537701	0.531568	0.61665	0.486881	0.412851	0.39872	0.412516
0.408533	0.506974	0.620777	0.477914	0.595327	0.289069	0.348556	0.480221
0.489347	0.793387	0.727573	0.605389	0.576372	0.545601	0.516971	0.652083
0.500811	0.715153	0.68718	0.727237	0.492604	0.501128	0.529164	0.50911
0.310234	0.444041	0.436305	0.345487	0.327786	0.454143	0.36572	0.553551
0.411583	0.511468	0.559107	0.441262	0.451127	0.501823	0.449707	0.591431
0.589521	0.598133	0.671666	0.638093	0.610963	0.463116	0.478326	0.460006
0.47662	0.468484	0.501125	0.48797	0.55085	0.452316	0.423617	0.525113
0.442931	0.663783	0.67732	0.655859	0.584586	0.440752	0.383725	0.505782
0.381078	0.582646	0.485792	0.502343	0.447054	0.473077	0.412122	0.679508
0.550468	0.454967	0.573571	0.496689	0.565679	0.452431	0.456284	0.541759
0.483245	0.539424	0.513197	0.552306	0.495555	0.286232	0.299437	0.374736
0.406554	0.697571	0.577663	0.541694	0.492755	0.42696	0.405012	0.727438
0.589447	0.681292	0.69887	0.653155	0.583669	0.521796	0.49869	0.637287
0.439484	0.502109	0.531559	0.460617	0.39117	0.488858	0.470537	0.598002
0.435979	0.520344	0.554898	0.604113	0.476281	0.535195	0.571032	0.488271
0.40997	0.694708	0.474619	0.592666	0.445981	0.34423	0.475284	0.509924
0.425134	0.703801	0.548143	0.600473	0.495185	0.347907	0.378451	0.41454
0.507	0.718848	0.460163	0.572388	0.540464	0.51068	0.507488	0.554808
0.48695	0.638628	0.549588	0.589084	0.548675	0.486597	0.511688	0.523245
0.469717	0.709133	0.565035	0.549527	0.527892	0.507018	0.525796	0.627531
0.495101	0.767415	0.597893	0.662575	0.564085	0.619476	0.623886	0.693995
0.543322	0.577713	0.77604	0.497485	0.64656	0.499099	0.484095	0.674336
0.408006	0.728806	0.566694	0.6542	0.42842	0.408835	0.470571	0.53255
0.373121	0.576852	0.51757	0.498009	0.524676	0.473632	0.49915	0.503886
0.475994	0.507736	0.557756	0.555302	0.40379	0.447159	0.352293	0.486292
0.498591	0.734474	0.64413	0.632857	0.589168	0.46878	0.449861	0.547626
0.388437	0.514039	0.497803	0.45391	0.508642	0.43729	0.429936	0.492835
0.389655	0.48661	0.450525	0.4259	0.487358	0.380637	0.393749	0.41795
0.451787	0.537246	0.579905	0.471507	0.498901	0.430597	0.422493	0.573903
0.421793	0.536975	0.455676	0.618037	0.50537	0.510413	0.536676	0.658644
0.46292	0.649979	0.460422	0.492373	0.448826	0.577775	0.569278	0.661825
0.439987	0.691895	0.564658	0.50603	0.481061	0.434231	0.47	0.511847
0.579667	0.516904	0.622617	0.577054	0.593843	0.479351	0.46956	0.547169
0.56819	0.646832	0.504231	0.616486	0.56167	0.548253	0.524844	0.644527
0.589176	0.678453	0.675371	0.674391	0.706431	0.458122	0.488966	0.564901
0.426775	0.590021	0.452437	0.503842	0.426986	0.523442	0.501852	0.669186
0.361551	0.644371	0.512819	0.570307	0.413661	0.466699	0.411514	0.608353
0.330199	0.683747	0.476386	0.412404	0.46242	0.345688	0.27926	0.372305
0.388043	0.483314	0.520236	0.487847	0.371957	0.436604	0.425891	0.486669
0.505682	0.613813	0.595645	0.485372	0.611589	0.454522	0.472706	0.469021
0.407991	0.571373	0.643731	0.53862	0.539891	0.369086	0.36119	0.573454
0.449548	0.561153	0.55673	0.5489	0.555334	0.540781	0.513114	0.704755
0.476832	0.672246	0.530688	0.61199	0.462527	0.503054	0.442365	0.705893
0.447545	0.524248	0.610196	0.462129	0.513383	0.359384	0.350019	0.486171
0.451696	0.489833	0.47489	0.532855	0.445151	0.520891	0.506335	0.636322
0.470836	0.492778	0.707796	0.528226	0.544176	0.506046	0.532163	0.533189
0.397528	0.418396	0.505603	0.377549	0.447198	0.307519	0.299435	0.519971
0.428836	0.581874	0.611125	0.555897	0.51441	0.407311	0.46113	0.562067
0.449658	0.698864	0.621976	0.588366	0.528998	0.568165	0.482496	0.59829
0.495862	0.508031	0.626292	0.544916	0.498364	0.34055	0.387965	0.38166
0.458634	0.564128	0.590605	0.496743	0.540687	0.545558	0.504706	0.677813
0.580261	0.795767	0.70036	0.799034	0.59701	0.584528	0.625736	0.550242
0.445969	0.609723	0.43096	0.556686	0.428398	0.488435	0.539287	0.544745
0.459433	0.517845	0.492321	0.481935	0.555278	0.338136	0.348961	0.582245
0.535919	0.617175	0.614677	0.541123	0.48396	0.545092	0.476504	0.690431
0.471641	0.665019	0.557332	0.562531	0.50337	0.490872	0.468557	0.57057
0.4145	0.808295	0.565524	0.664489	0.530042	0.403068	0.41902	0.50825
0.42111	0.534709	0.429274	0.620025	0.452147	0.518956	0.595735	0.503912
0.411457	0.660235	0.446811	0.500038	0.428521	0.473869	0.484851	0.511704
0.454512	0.514981	0.509093	0.515219	0.53997	0.375854	0.471353	0.516676
0.418701	0.42753	0.710405	0.404615	0.544474	0.409161	0.3588	0.559984
0.484137	0.650792	0.643615	0.574879	0.495782	0.571544	0.555529	0.643072
0.420967	0.540149	0.505363	0.44255	0.512065	0.492782	0.403618	0.725474
0.396095	0.453748	0.548868	0.345061	0.524432	0.42225	0.397757	0.523682
0.571013	0.826944	0.535969	0.730031	0.555554	0.552696	0.560096	0.688174
0.399395	0.57989	0.566748	0.473118	0.360604	0.396275	0.477887	0.465963
0.689205	0.71981	0.654726	0.726858	0.756044	0.582804	0.583139	0.61146
0.472532	0.728486	0.466366	0.691639	0.469467	0.370644	0.397421	0.464258
0.524944	0.735412	0.555832	0.663131	0.57482	0.430004	0.409568	0.480991
0.419512	0.384625	0.532827	0.482574	0.486248	0.45853	0.480087	0.460564
0.520043	0.767389	0.711246	0.668363	0.508296	0.610269	0.579357	0.575771
0.677942	0.900972	0.637352	0.833246	0.678336	0.566994	0.600778	0.572578
0.453842	0.828188	0.495356	0.730495	0.478875	0.605146	0.603666	0.649653
0.52261	0.657524	0.586546	0.519181	0.564891	0.578915	0.517546	0.661973
0.542745	0.791647	0.673835	0.763536	0.631504	0.738688	0.687196	0.753491
0.375207	0.494741	0.587517	0.394365	0.489537	0.425739	0.464818	0.577131
0.496924	0.695616	0.572082	0.500314	0.427361	0.529924	0.454989	0.629124
0.531341	0.68812	0.55972	0.639242	0.5797	0.599651	0.529379	0.70652
0.422901	0.513415	0.663637	0.463685	0.454136	0.391011	0.347275	0.462374
0.42858	0.574957	0.558139	0.36907	0.483116	0.380023	0.352518	0.486284
0.473453	0.774299	0.751728	0.649761	0.565504	0.566312	0.481031	0.70101
0.396868	0.67769	0.607657	0.667471	0.50317	0.473309	0.459775	0.50576
0.50814	0.478565	0.709211	0.532264	0.575265	0.534713	0.54159	0.542155
0.531959	0.72571	0.707905	0.66812	0.591512	0.489984	0.437422	0.699913
0.39311	0.607132	0.726569	0.568616	0.504059	0.397409	0.434155	0.480559
0.565725	0.653203	0.542534	0.605718	0.598026	0.547705	0.519405	0.758636
0.506326	0.827262	0.619817	0.639443	0.576315	0.487025	0.495723	0.580281
0.413859	0.673205	0.4874	0.561989	0.46391	0.421818	0.394261	0.417526
0.516414	0.534901	0.693356	0.577219	0.600335	0.478663	0.525501	0.517833
0.482681	0.615675	0.590517	0.627453	0.520126	0.506823	0.512412	0.576926
0.380806	0.54844	0.637776	0.529582	0.519253	0.442993	0.497926	0.499799
0.390575	0.485142	0.511064	0.49069	0.478357	0.34513	0.325156	0.494916
0.377208	0.557072	0.464317	0.525677	0.469509	0.446588	0.421858	0.591897
0.459357	0.645797	0.782196	0.530964	0.524954	0.528345	0.404764	0.683416
0.438628	0.526427	0.638944	0.395056	0.568124	0.489052	0.493582	0.579622
0.374614	0.573333	0.443722	0.496074	0.391376	0.35702	0.337396	0.576247
0.556475	0.733118	0.702156	0.730448	0.59198	0.455532	0.406988	0.465853
0.486625	0.707759	0.60752	0.646535	0.618346	0.437337	0.489973	0.444224
0.474451	0.473339	0.69153	0.45919	0.599929	0.587194	0.602612	0.718132
0.563871	0.626792	0.651759	0.538051	0.644437	0.628879	0.668806	0.565033
0.433804	0.44543	0.614874	0.502413	0.555095	0.484134	0.443734	0.525047
0.576659	0.649637	0.494488	0.619031	0.589797	0.413583	0.393596	0.515759
0.607335	0.753367	0.64824	0.671953	0.629748	0.556572	0.656431	0.492241
0.451362	0.744411	0.538204	0.682938	0.463748	0.48253	0.424788	0.62853
0.438868	0.406861	0.55728	0.381649	0.553014	0.546425	0.487503	0.612783
0.445193	0.633622	0.508114	0.555658	0.455992	0.464849	0.573153	0.538245
0.438337	0.488823	0.724893	0.463219	0.614395	0.275564	0.247281	0.379931
0.411778	0.583104	0.616653	0.423414	0.502644	0.58754	0.638955	0.665371
0.401884	0.455898	0.503802	0.411514	0.423641	0.570322	0.473524	0.799568
0.404743	0.450355	0.488647	0.492538	0.449585	0.378813	0.374804	0.572397
0.378244	0.705189	0.471371	0.371506	0.424107	0.418423	0.467969	0.448486
0.47475	0.649463	0.55335	0.585149	0.521973	0.610469	0.531038	0.623513
0.478118	0.539958	0.565799	0.535703	0.515015	0.522345	0.571934	0.622272
0.374967	0.590883	0.44844	0.581929	0.396587	0.310986	0.328491	0.445933
0.392699	0.558958	0.615552	0.53759	0.491682	0.420477	0.398295	0.547985
0.330463	0.610306	0.537646	0.398819	0.440366	0.454245	0.419324	0.497221
0.456989	0.576717	0.593916	0.64325	0.451379	0.440035	0.449036	0.561795
0.411098	0.631433	0.360496	0.457696	0.394855	0.357528	0.34364	0.677632
0.388398	0.650301	0.675774	0.557999	0.389002	0.480078	0.530548	0.564509
0.438493	0.714429	0.618489	0.585574	0.46072	0.428182	0.5736	0.361156
0.343308	0.575546	0.540776	0.485379	0.324355	0.424874	0.406716	0.467357
0.437666	0.578362	0.585815	0.466782	0.500916	0.502335	0.569867	0.54196
0.403412	0.575602	0.365001	0.573042	0.372187	0.378153	0.494431	0.352071
0.538652	0.555309	0.653877	0.536138	0.537812	0.424436	0.375973	0.539387
0.430919	0.587937	0.551191	0.461937	0.509479	0.423281	0.485374	0.47265
0.438974	0.716776	0.530014	0.720478	0.40764	0.398648	0.369	0.551906
0.521465	0.682687	0.614128	0.682735	0.581292	0.53431	0.592782	0.454402
0.396915	0.57996	0.646	0.563932	0.502574	0.508429	0.473291	0.633888
0.528908	0.591056	0.677548	0.573586	0.70988	0.55799	0.500321	0.573865
0.528848	0.66494	0.481307	0.6526	0.42769	0.516498	0.536066	0.554732
0.493732	0.521871	0.486286	0.526391	0.522693	0.472352	0.44174	0.564387
0.367192	0.620437	0.403222	0.565267	0.41543	0.470642	0.41914	0.40856
0.407466	0.502632	0.470869	0.462177	0.411061	0.415529	0.443037	0.566654
0.449271	0.623106	0.525772	0.501751	0.527363	0.399115	0.463977	0.411512
0.418721	0.71305	0.488556	0.630749	0.451447	0.488641	0.487309	0.603381
0.619503	0.67177	0.477145	0.642765	0.518614	0.455371	0.590443	0.477726
0.463406	0.661889	0.470108	0.542437	0.508243	0.467492	0.483166	0.468968
0.331324	0.556458	0.615184	0.539074	0.431105	0.424324	0.336649	0.468844
0.442214	0.599279	0.458773	0.521938	0.413409	0.524335	0.481948	0.681343
0.42848	0.613791	0.514968	0.495743	0.446165	0.455056	0.49879	0.54627
0.447232	0.502164	0.696616	0.577795	0.589011	0.435292	0.450795	0.385714
0.524044	0.568265	0.490907	0.522916	0.51119	0.571707	0.530032	0.618687
0.386496	0.568204	0.542425	0.512966	0.436682	0.487336	0.42182	0.57004
0.539	0.759583	0.717505	0.675548	0.60333	0.405247	0.414923	0.400401
0.496581	0.541791	0.622822	0.512564	0.519348	0.440909	0.437128	0.624979
0.402287	0.730574	0.549846	0.619488	0.534551	0.435712	0.402619	0.487731
0.370769	0.428457	0.725468	0.348198	0.457638	0.361991	0.368216	0.464359
0.421095	0.568809	0.437155	0.412548	0.416827	0.380659	0.442358	0.541403
0.385103	0.656733	0.605792	0.594261	0.47959	0.480408	0.463551	0.610147
0.444042	0.579135	0.510538	0.57691	0.526809	0.50704	0.495733	0.569313
0.339711	0.324705	0.57838	0.441591	0.420635	0.459755	0.442112	0.567803
0.512735	0.664229	0.805165	0.614012	0.604413	0.524984	0.571615	0.568727
0.527397	0.588813	0.59177	0.542253	0.545531	0.606592	0.535567	0.691539
0.414023	0.647347	0.600036	0.524735	0.422021	0.325541	0.265287	0.502753
0.530855	0.621691	0.561962	0.631122	0.477379	0.437758	0.476922	0.481016
0.403314	0.687745	0.563754	0.575804	0.463142	0.349893	0.406227	0.458373
0.572093	0.56804	0.589422	0.62864	0.617402	0.486045	0.582492	0.566579
0.531029	0.690607	0.691685	0.690732	0.595824	0.516617	0.598527	0.49759
0.47173	0.582266	0.576051	0.576524	0.450518	0.463686	0.478963	0.476479
0.436452	0.562843	0.637343	0.458267	0.445752	0.475488	0.416092	0.563965
0.464638	0.444579	0.577813	0.485412	0.494452	0.493089	0.498802	0.614108
0.544386	0.520051	0.637857	0.519066	0.537254	0.54022	0.545011	0.613873
0.448025	0.569273	0.619736	0.525753	0.519936	0.497581	0.519162	0.538721
0.58166	0.600033	0.699682	0.564317	0.65566	0.541539	0.53183	0.646143
0.398646	0.522829	0.486546	0.495281	0.531985	0.398705	0.44039	0.411408
0.567217	0.725657	0.554503	0.725708	0.710679	0.610319	0.620497	0.716027
0.695495	0.79683	0.652118	0.791139	0.631485	0.788131	0.767023	0.878947
0.446062	0.721882	0.731489	0.590898	0.593136	0.412529	0.388193	0.454388
0.394135	0.563662	0.566314	0.629833	0.423421	0.481877	0.499916	0.535162
0.448116	0.635362	0.613718	0.685083	0.511416	0.407238	0.404442	0.433439
0.499981	0.826221	0.535916	0.734323	0.631057	0.478049	0.443408	0.538291
0.39491	0.464878	0.46796	0.362468	0.365889	0.354793	0.422097	0.473444
0.513145	0.647321	0.659684	0.610441	0.547933	0.539975	0.539791	0.629122
0.595881	0.881574	0.697656	0.824842	0.588306	0.558585	0.55814	0.620249
0.503978	0.647747	0.62335	0.514977	0.506648	0.571299	0.517129	0.643789
0.532391	0.706973	0.618935	0.669326	0.553903	0.581371	0.608838	0.587417
0.554129	0.67179	0.69706	0.645784	0.607479	0.515185	0.506501	0.607936
0.398495	0.63685	0.558181	0.33606	0.470959	0.431359	0.440234	0.473545
0.545449	0.820184	0.510904	0.803277	0.544272	0.499161	0.60909	0.510377
0.446701	0.620507	0.530798	0.627564	0.497488	0.488507	0.537237	0.534226
0.361542	0.551126	0.620472	0.486446	0.437736	0.418952	0.436419	0.467683
0.65586	0.837358	0.656031	0.748613	0.65863	0.604904	0.652628	0.744512
0.444202	0.75503	0.665337	0.695801	0.569701	0.372304	0.371406	0.357114
0.464026	0.678034	0.647361	0.57143	0.561922	0.499802	0.516759	0.440185
0.351778	0.71183	0.459438	0.59401	0.33591	0.372054	0.344038	0.495666
0.468304	0.608235	0.603852	0.550326	0.506436	0.438255	0.446438	0.607713
0.338189	0.344407	0.430284	0.426835	0.356227	0.358125	0.427495	0.536286
0.550551	0.77944	0.754178	0.660305	0.612479	0.43084	0.434515	0.502352
0.358841	0.565424	0.533939	0.594854	0.495145	0.515411	0.415524	0.628547
0.447377	0.574426	0.687855	0.579017	0.538223	0.433646	0.484611	0.541988
0.42024	0.616046	0.484766	0.455679	0.409491	0.362611	0.41955	0.361964
0.565031	0.83309	0.832324	0.756921	0.676889	0.470575	0.512731	0.56732
0.524586	0.661229	0.561938	0.621886	0.571156	0.561689	0.600266	0.536327
0.474626	0.498444	0.52856	0.509979	0.503927	0.429781	0.489781	0.490327
0.394781	0.566959	0.47519	0.539173	0.46992	0.344573	0.360362	0.438938
0.423702	0.632869	0.56169	0.5417	0.47395	0.480129	0.502273	0.537694
0.430001	0.607502	0.4763	0.488875	0.400175	0.490889	0.434053	0.638846
0.439609	0.503714	0.770615	0.498772	0.652701	0.603539	0.555845	0.775677
0.413805	0.579767	0.506695	0.499535	0.374273	0.383286	0.453445	0.57989
0.476563	0.506524	0.65888	0.499431	0.606267	0.506426	0.471401	0.632416
0.396751	0.629512	0.616855	0.489036	0.531706	0.44321	0.351618	0.708694
0.392958	0.465859	0.523663	0.403544	0.421029	0.466759	0.459062	0.584441
0.438681	0.639386	0.441279	0.51344	0.378123	0.46969	0.516226	0.463732
0.408369	0.58944	0.44326	0.518358	0.460249	0.442262	0.514281	0.558103
0.476313	0.722557	0.417681	0.621096	0.356544	0.442621	0.488471	0.474905
0.423011	0.584049	0.529619	0.592473	0.441181	0.487864	0.499309	0.594004
0.604057	0.798479	0.680557	0.787978	0.628834	0.582082	0.574387	0.76901
0.482163	0.552786	0.482203	0.516404	0.527383	0.417898	0.471581	0.432282
0.449965	0.568632	0.585951	0.502862	0.451758	0.561704	0.446813	0.787801
0.361023	0.584642	0.4706	0.514259	0.393726	0.371812	0.407976	0.465427
0.477205	0.698759	0.532152	0.647389	0.488562	0.464232	0.421966	0.517913
0.614209	0.76081	0.695559	0.771675	0.623688	0.626605	0.600758	0.757333
0.531258	0.616037	0.718689	0.601226	0.651204	0.549154	0.546719	0.533868
0.41592	0.581691	0.52803	0.511532	0.389832	0.337804	0.320746	0.470327
0.407999	0.694236	0.497375	0.560177	0.50068	0.442383	0.428978	0.606548
0.509919	0.705289	0.499157	0.618298	0.527513	0.598053	0.523705	0.531915
0.723224	0.66953	0.711949	0.736497	0.763351	0.676221	0.671521	0.70167
0.42913	0.572796	0.7144	0.488004	0.615351	0.456657	0.374537	0.595896
0.570491	0.572453	0.394662	0.491729	0.470247	0.495908	0.491677	0.632338
0.398026	0.643879	0.563343	0.54	0.467404	0.333731	0.45086	0.327282
0.451283	0.595361	0.523723	0.588025	0.474558	0.514783	0.472782	0.725844
0.447316	0.550815	0.489585	0.438423	0.443461	0.429947	0.448683	0.491181
0.438558	0.611534	0.591938	0.578535	0.480282	0.512151	0.484117	0.608503
0.598834	0.591069	0.734518	0.607238	0.653682	0.567027	0.533357	0.617195
0.415569	0.468927	0.578587	0.48926	0.454764	0.457392	0.422718	0.523682
0.525263	0.629217	0.673597	0.597089	0.566744	0.42926	0.432079	0.505706
0.508298	0.489556	0.515307	0.474301	0.50956	0.452293	0.404511	0.460993
0.569831	0.738652	0.779372	0.679889	0.655965	0.490877	0.569725	0.544965
0.441648	0.714924	0.459408	0.547737	0.461557	0.406296	0.424085	0.4862
0.44068	0.554025	0.53963	0.582235	0.548523	0.392741	0.385879	0.383043
0.472665	0.695229	0.522265	0.687397	0.500367	0.557916	0.559651	0.664163
0.444407	0.52755	0.650333	0.519449	0.519909	0.367713	0.423148	0.455045
0.406353	0.721267	0.537893	0.635291	0.501878	0.344626	0.54455	0.404889
0.477521	0.739884	0.658223	0.65117	0.422268	0.409804	0.372836	0.491918
0.27991	0.497757	0.300061	0.563428	0.321698	0.454899	0.398702	0.570133
0.433866	0.802834	0.414538	0.681588	0.434348	0.596373	0.695816	0.469538
0.351115	0.512604	0.634398	0.407087	0.453082	0.368344	0.37988	0.520461
0.645446	0.722641	0.648686	0.60262	0.606255	0.776464	0.746204	0.890159
0.469618	0.65063	0.706145	0.524859	0.476429	0.537509	0.469294	0.560675
0.459216	0.620644	0.324235	0.579701	0.489102	0.435039	0.511578	0.42511
0.483453	0.64817	0.6458	0.46407	0.469716	0.468832	0.507003	0.677145
0.431848	0.50505	0.523618	0.520668	0.523894	0.365202	0.383303	0.480495
0.418657	0.476148	0.41397	0.593087	0.451332	0.587479	0.529291	0.556694
0.490265	0.379199	0.605776	0.379889	0.579698	0.525072	0.45599	0.551374
0.316559	0.502218	0.439774	0.385081	0.347578	0.390572	0.323652	0.507479
0.53022	0.627358	0.558767	0.614957	0.522036	0.595541	0.447121	0.63028
0.485031	0.605808	0.630117	0.689711	0.524546	0.428033	0.436664	0.445973
0.428834	0.57668	0.759996	0.498832	0.527163	0.455486	0.437609	0.494559
0.438078	0.617838	0.502393	0.458602	0.461523	0.492043	0.398891	0.752625
0.434636	0.621828	0.604917	0.503799	0.495222	0.490619	0.541777	0.493017
0.49784	0.495776	0.715164	0.487817	0.488461	0.539428	0.576674	0.542142
0.36144	0.381216	0.466403	0.340329	0.429014	0.400347	0.395149	0.499165
0.475515	0.744552	0.564071	0.58733	0.508755	0.355854	0.409415	0.387966
0.411303	0.561511	0.652908	0.46953	0.499431	0.421203	0.408439	0.594096
0.403098	0.689399	0.533636	0.566344	0.377529	0.528928	0.432486	0.653324
0.422453	0.62094	0.46863	0.608904	0.447971	0.548123	0.555395	0.608602
0.398754	0.632904	0.546956	0.507367	0.528875	0.46742	0.441615	0.601245
0.500557	0.701568	0.548015	0.665284	0.478313	0.566489	0.540723	0.619901
0.498139	0.814406	0.636346	0.658366	0.635324	0.565298	0.557696	0.592979
0.406938	0.63036	0.456449	0.496212	0.504139	0.522892	0.451508	0.55402
0.621239	0.772848	0.681945	0.621199	0.637887	0.667873	0.652005	0.829199
0.430328	0.531894	0.715979	0.519059	0.496137	0.490381	0.40836	0.59837
0.524283	0.588758	0.372544	0.557875	0.517759	0.465334	0.545938	0.541176
0.489292	0.650878	0.730359	0.636281	0.662876	0.547188	0.542138	0.611791
0.358461	0.426827	0.451931	0.439889	0.393671	0.455874	0.476662	0.49143
0.508435	0.661422	0.5537	0.560448	0.485149	0.422922	0.432304	0.459848
0.434669	0.575609	0.476277	0.578655	0.44567	0.424476	0.405026	0.440982
0.518771	0.634615	0.598986	0.661776	0.598104	0.53958	0.533457	0.583269
0.444088	0.649311	0.586982	0.556209	0.452336	0.447771	0.471209	0.507622
0.515967	0.504496	0.546865	0.487384	0.546943	0.516994	0.551344	0.617496
0.368432	0.553191	0.605495	0.428723	0.498583	0.452047	0.418643	0.621334
0.406354	0.548776	0.520063	0.393621	0.458798	0.437147	0.431113	0.453013
0.395065	0.631468	0.53431	0.594647	0.484359	0.394763	0.377415	0.419946
0.478305	0.724581	0.500672	0.628413	0.513088	0.565122	0.485467	0.679772
0.5241	0.516638	0.645605	0.498969	0.577379	0.543118	0.591406	0.51537
0.414129	0.682665	0.59537	0.686602	0.45149	0.476783	0.430175	0.501563
0.480222	0.582278	0.650097	0.524967	0.446255	0.590119	0.522461	0.570651
0.519795	0.698477	0.651597	0.611651	0.584766	0.373899	0.366478	0.387099
0.620876	0.782229	0.752053	0.735179	0.678634	0.767133	0.769353	0.826457
0.514967	0.477663	0.644705	0.5071	0.548609	0.357591	0.352936	0.430614
0.387735	0.551688	0.646853	0.532273	0.462466	0.453349	0.425121	0.516417
0.424694	0.632197	0.462767	0.468627	0.569653	0.451649	0.502128	0.549141
0.571633	0.827956	0.738855	0.614196	0.759066	0.491724	0.507339	0.530347
0.558028	0.859817	0.504262	0.706422	0.618194	0.475863	0.405583	0.602614
0.519199	0.88748	0.493154	0.732109	0.503352	0.589404	0.547483	0.582497
0.532817	0.518885	0.589815	0.517736	0.548604	0.360776	0.393647	0.422511
0.365048	0.624691	0.536737	0.518282	0.435731	0.46135	0.442803	0.376965
0.592022	0.819645	0.720076	0.708171	0.679508	0.629265	0.63404	0.687592
0.378132	0.593452	0.559758	0.560558	0.428332	0.488496	0.451397	0.622157
0.509192	0.61811	0.506135	0.671702	0.55472	0.618729	0.503093	0.608812
0.459262	0.77439	0.517491	0.586298	0.574904	0.547116	0.543772	0.626315
0.461422	0.58854	0.548248	0.47972	0.503978	0.52252	0.468559	0.642983
0.470912	0.638805	0.82083	0.564512	0.636365	0.517094	0.488236	0.517237
0.46514	0.630853	0.745193	0.47814	0.589209	0.533494	0.631006	0.691745
0.531825	0.642205	0.583131	0.517652	0.532948	0.481183	0.510265	0.612411
0.552939	0.850188	0.66041	0.767056	0.636634	0.603928	0.610713	0.645207
0.426381	0.818097	0.492578	0.668025	0.43932	0.291443	0.315413	0.379824
0.450456	0.634098	0.594146	0.568744	0.512142	0.40192	0.336229	0.437172
0.41739	0.436521	0.582125	0.430463	0.447549	0.580246	0.499449	0.749066
0.37772	0.527427	0.614326	0.402214	0.412684	0.369727	0.383676	0.403878
0.517693	0.728456	0.509818	0.498044	0.582754	0.583945	0.556431	0.785517
0.420302	0.681926	0.511184	0.525256	0.371774	0.497881	0.446571	0.472116
0.715637	0.807944	0.695216	0.733867	0.679994	0.722766	0.715846	0.750575
0.452529	0.787924	0.622829	0.689502	0.468106	0.556906	0.576954	0.466346
0.539514	0.684365	0.709288	0.737082	0.632841	0.710785	0.653882	0.723249
0.351789	0.445628	0.509359	0.424448	0.447126	0.495684	0.384779	0.780371
0.493812	0.633194	0.477799	0.47859	0.460586	0.403459	0.366426	0.4564
0.520878	0.587058	0.602389	0.609509	0.530255	0.548857	0.541631	0.651492
0.427715	0.492612	0.634265	0.457753	0.455484	0.564432	0.55534	0.625107
0.469584	0.494951	0.663811	0.430937	0.565824	0.459436	0.447499	0.569656
0.501604	0.67584	0.617783	0.597999	0.531584	0.449603	0.428539	0.55272
0.504033	0.708499	0.628717	0.686498	0.591031	0.383388	0.366082	0.5447
0.486439	0.648777	0.789692	0.494514	0.647778	0.485452	0.448128	0.65826
0.411911	0.588145	0.569752	0.498092	0.450462	0.530986	0.496912	0.566814
0.429891	0.787645	0.451009	0.646928	0.56198	0.497185	0.475209	0.537059
0.450429	0.653817	0.510664	0.551183	0.511528	0.508269	0.499307	0.535588
0.475406	0.604136	0.628361	0.541002	0.576357	0.499167	0.500804	0.56948
0.412864	0.673222	0.706597	0.565659	0.52358	0.4915	0.450597	0.58854
0.519083	0.694677	0.731572	0.519224	0.621791	0.552354	0.555123	0.641204
0.540376	0.513109	0.487603	0.525125	0.481918	0.543	0.546862	0.594164
0.394135	0.588013	0.650342	0.541179	0.568585	0.42747	0.387081	0.630799
0.462421	0.516884	0.621702	0.479675	0.63699	0.432562	0.48472	0.54497
0.536625	0.616169	0.661151	0.542859	0.524068	0.637677	0.592817	0.710091
0.482182	0.628268	0.602388	0.586989	0.563426	0.479192	0.508385	0.577131
0.496578	0.700998	0.780541	0.59307	0.690853	0.528541	0.550398	0.650047
0.379692	0.386854	0.509456	0.431397	0.447851	0.452206	0.4442	0.595099
0.471458	0.539353	0.689674	0.54376	0.507599	0.57176	0.599897	0.666468
0.387703	0.668499	0.579679	0.638172	0.556776	0.474256	0.457015	0.679591
0.471656	0.586126	0.528634	0.556552	0.538462	0.495282	0.541433	0.445759
0.346641	0.504381	0.433998	0.542039	0.369666	0.462702	0.381554	0.628073
0.306558	0.497789	0.470624	0.53967	0.410828	0.390957	0.405071	0.398484
0.55527	0.653187	0.625778	0.692801	0.683709	0.572637	0.59395	0.473737
0.649012	0.689797	0.604537	0.711505	0.608662	0.591661	0.57187	0.607974
0.527899	0.661399	0.540184	0.687618	0.589207	0.559617	0.553622	0.571686
0.408326	0.586711	0.385144	0.570278	0.348038	0.498131	0.499307	0.55718
0.359465	0.709546	0.535379	0.62275	0.378798	0.441357	0.573342	0.511723
0.449151	0.36512	0.449451	0.502999	0.460705	0.423209	0.385607	0.679164
0.408141	0.488526	0.457901	0.42971	0.474096	0.360534	0.391758	0.477548
0.452232	0.63095	0.655941	0.60036	0.513608	0.49242	0.47349	0.465774
0.522416	0.694096	0.639201	0.6656	0.539746	0.536384	0.511396	0.706702
0.422254	0.73252	0.543367	0.455329	0.444559	0.437751	0.403141	0.618077
0.405287	0.729622	0.678867	0.675163	0.497114	0.535634	0.524682	0.525875
0.480905	0.60301	0.605849	0.435026	0.589633	0.526785	0.554189	0.583471
0.348381	0.453393	0.519132	0.461942	0.432088	0.360158	0.381429	0.468548
0.488158	0.707632	0.395354	0.534276	0.438727	0.582977	0.55999	0.750089
0.675759	0.687265	0.765361	0.615543	0.68741	0.723802	0.681826	0.781409
0.479316	0.859173	0.607773	0.683592	0.618113	0.540551	0.478155	0.626225
0.440738	0.530844	0.502221	0.499183	0.475721	0.496332	0.482447	0.534064
0.44787	0.360054	0.395046	0.498241	0.483439	0.532341	0.45758	0.683854
0.377848	0.631224	0.640318	0.590793	0.423141	0.580798	0.581087	0.524567
0.415984	0.541196	0.630854	0.496909	0.472513	0.40212	0.345861	0.415106
0.36883	0.589751	0.453912	0.492809	0.394083	0.416315	0.408535	0.541685
0.48972	0.845453	0.711072	0.713809	0.518413	0.648775	0.631019	0.730024
0.520986	0.62163	0.773401	0.564462	0.524964	0.519912	0.492113	0.691021
0.335242	0.50049	0.436772	0.405077	0.405228	0.439089	0.45342	0.473631
0.655921	0.828101	0.603184	0.75923	0.584528	0.664796	0.682872	0.68672
0.418281	0.456003	0.45514	0.471772	0.464424	0.412683	0.415348	0.417149
0.416888	0.489877	0.525431	0.367439	0.523529	0.382162	0.422537	0.385367
0.493766	0.666675	0.527045	0.612667	0.508233	0.447615	0.477844	0.546058
0.438753	0.610036	0.54921	0.527016	0.497397	0.497528	0.547824	0.531557
0.460705	0.688711	0.576852	0.564698	0.472475	0.557065	0.512935	0.500724
0.442484	0.616214	0.424087	0.44361	0.444908	0.418051	0.368618	0.370485
0.560093	0.780726	0.617827	0.645618	0.577565	0.474096	0.435407	0.517577
0.42365	0.585791	0.65019	0.519143	0.497065	0.479001	0.493009	0.557778
0.565054	0.80222	0.666498	0.672722	0.554855	0.495014	0.46839	0.500746
0.405336	0.545803	0.45728	0.555515	0.509786	0.38518	0.347591	0.53186
0.476485	0.728904	0.592029	0.673104	0.53774	0.48921	0.478917	0.535836
0.442247	0.730001	0.65911	0.611347	0.56993	0.484412	0.493699	0.477945
0.440582	0.687125	0.506454	0.600149	0.432636	0.544225	0.519578	0.566843
0.62264	0.719347	0.601448	0.728454	0.588926	0.702122	0.690912	0.636661
0.407418	0.419689	0.557211	0.470285	0.448015	0.541962	0.554045	0.591542
0.392508	0.415849	0.532285	0.418864	0.38446	0.369095	0.379853	0.470338
0.488724	0.758903	0.694673	0.627178	0.61935	0.422642	0.452386	0.477698
0.493967	0.731399	0.682104	0.625882	0.535705	0.391399	0.415047	0.530834
0.680954	0.728744	0.630684	0.784016	0.62255	0.777379	0.770668	0.815304
0.54092	0.665005	0.575792	0.563089	0.521173	0.538914	0.569325	0.603784
0.470346	0.650464	0.553826	0.611997	0.534733	0.410828	0.516157	0.514986
0.486167	0.501163	0.462944	0.445957	0.551264	0.561621	0.539284	0.6122
0.446966	0.79029	0.599658	0.669077	0.5412	0.532319	0.558596	0.476876
0.43168	0.767323	0.708598	0.69027	0.470207	0.400043	0.380537	0.541393
0.496045	0.633995	0.618004	0.686977	0.513369	0.452919	0.441575	0.495524
0.422613	0.623757	0.635987	0.527552	0.562888	0.462012	0.516983	0.553522
0.481391	0.714103	0.579783	0.502866	0.603161	0.446653	0.429347	0.585393
0.641039	0.869879	0.716502	0.74917	0.609634	0.730588	0.755345	0.705641
0.570188	0.526644	0.666351	0.565361	0.597175	0.550331	0.481295	0.645427
0.493603	0.640736	0.518444	0.640781	0.495064	0.454919	0.468513	0.645394
0.462098	0.644073	0.60511	0.530584	0.602207	0.521093	0.459875	0.70653
0.458253	0.801219	0.628912	0.560979	0.517619	0.457786	0.412016	0.519028
0.385584	0.558046	0.535439	0.492067	0.566498	0.53724	0.472139	0.543694
0.508414	0.64188	0.510734	0.565134	0.521604	0.513204	0.510915	0.521442
0.59219	0.722005	0.666939	0.687572	0.655123	0.481993	0.505399	0.499666
0.47019	0.604689	0.568075	0.554627	0.532061	0.449925	0.442739	0.642778
0.479885	0.696104	0.690371	0.514439	0.489092	0.518219	0.442156	0.596162
0.48192	0.543843	0.466201	0.517605	0.489531	0.520659	0.517007	0.579367
0.435836	0.662351	0.519681	0.571117	0.504403	0.467701	0.477229	0.509462
0.269126	0.393711	0.376978	0.501528	0.413517	0.376722	0.307171	0.413615
0.46873	0.650211	0.491554	0.500206	0.519605	0.477732	0.415208	0.598241
0.461847	0.590226	0.375727	0.516715	0.500762	0.391034	0.424792	0.488217
0.455417	0.508068	0.634722	0.511461	0.464574	0.476528	0.519032	0.50991
0.332185	0.618534	0.569106	0.482141	0.396688	0.474999	0.49139	0.590081
0.514378	0.452749	0.452614	0.448634	0.529497	0.511928	0.462684	0.653768
0.535599	0.790279	0.681212	0.622603	0.574292	0.536288	0.523125	0.585551
0.361118	0.565069	0.492582	0.51239	0.415898	0.341048	0.438105	0.466468
0.326837	0.550224	0.635093	0.387317	0.468354	0.324056	0.348232	0.474413
0.454161	0.619727	0.469343	0.414478	0.529507	0.360122	0.395507	0.447458
0.435259	0.694084	0.570272	0.622854	0.494774	0.493671	0.46586	0.490564
0.452341	0.617206	0.414365	0.609571	0.412957	0.400474	0.354236	0.307501
0.512499	0.672486	0.608102	0.648922	0.590317	0.531531	0.472873	0.590044
0.395397	0.549212	0.631663	0.490974	0.425586	0.359389	0.334046	0.385584
0.510102	0.713221	0.552285	0.685985	0.572408	0.545994	0.495794	0.607309
0.429315	0.686419	0.714902	0.462829	0.613658	0.615553	0.529148	0.837642
0.451019	0.824933	0.489657	0.705686	0.484158	0.509046	0.465315	0.522525
0.452212	0.500846	0.530003	0.426779	0.516789	0.449709	0.398837	0.500878
0.535166	0.723321	0.595398	0.590643	0.625738	0.488805	0.516082	0.554294
0.531172	0.727078	0.4618	0.680631	0.475973	0.454727	0.535807	0.475892
0.615207	0.806099	0.711125	0.811529	0.636671	0.721123	0.685233	0.77245
0.472818	0.544789	0.561926	0.474976	0.533872	0.489847	0.485864	0.597415
0.518398	0.524713	0.668078	0.524285	0.518299	0.423002	0.493215	0.432692
0.369445	0.531222	0.50245	0.452589	0.3847	0.352483	0.390131	0.520038
0.419345	0.719929	0.53285	0.628732	0.463328	0.495194	0.542938	0.49319
0.598103	0.627899	0.609288	0.555441	0.584016	0.583446	0.593299	0.553063
0.467247	0.547623	0.658784	0.521314	0.546278	0.548393	0.563722	0.636133
0.444096	0.539383	0.603084	0.426292	0.513378	0.420929	0.43291	0.487814
0.457097	0.557902	0.659056	0.545385	0.536976	0.387248	0.432522	0.543238
0.444492	0.739728	0.586636	0.601671	0.517577	0.556868	0.48388	0.739788
0.504587	0.79583	0.595293	0.564655	0.661141	0.427498	0.450371	0.473692
0.559664	0.667635	0.629244	0.639506	0.551916	0.53588	0.587181	0.549505
0.429197	0.386037	0.543415	0.448191	0.473466	0.376586	0.378037	0.375533
0.506619	0.607702	0.694682	0.63314	0.627628	0.593756	0.633936	0.644625
0.525605	0.774686	0.515139	0.781529	0.578733	0.504315	0.542047	0.361057
0.32504	0.583507	0.470289	0.495112	0.378381	0.42396	0.299656	0.441209
0.289336	0.569649	0.451756	0.558904	0.44867	0.433975	0.401526	0.609796
0.444821	0.561147	0.653894	0.465283	0.482654	0.340227	0.272425	0.467526
0.468532	0.579769	0.519457	0.577448	0.431146	0.384472	0.392848	0.536561
0.458369	0.505013	0.698785	0.354289	0.592242	0.353697	0.364561	0.411965
0.53893	0.604886	0.495084	0.568268	0.533016	0.504496	0.493282	0.551706
0.721526	0.891959	0.715307	0.746368	0.753211	0.686151	0.69512	0.695149
0.51539	0.746295	0.733794	0.68724	0.569735	0.483546	0.46956	0.643903
0.386081	0.609444	0.452771	0.573538	0.417444	0.36077	0.402404	0.433913
0.459754	0.592288	0.605547	0.5803	0.505779	0.423658	0.401017	0.56822
0.446481	0.681977	0.403337	0.665131	0.410456	0.383945	0.343899	0.413104
0.518055	0.651989	0.616555	0.650424	0.530704	0.56547	0.544432	0.683561
0.426606	0.554564	0.43765	0.47105	0.379655	0.456276	0.403132	0.562041
0.405886	0.619045	0.512161	0.470331	0.518328	0.3995	0.37292	0.442037
0.505534	0.6419	0.551916	0.64647	0.483448	0.606832	0.544892	0.610987
0.470051	0.600083	0.466943	0.481593	0.438532	0.550384	0.468933	0.680499
0.486597	0.57554	0.466512	0.590132	0.504063	0.531794	0.564401	0.622017
0.305213	0.603983	0.517676	0.493429	0.423512	0.414548	0.381777	0.538497
0.431752	0.544012	0.588693	0.465766	0.517417	0.467281	0.401583	0.573842
0.498856	0.839236	0.669967	0.779183	0.568164	0.421313	0.503855	0.398531
0.415235	0.638711	0.550357	0.497601	0.445781	0.382081	0.418036	0.458689
0.504979	0.687667	0.65218	0.601684	0.576179	0.525391	0.545585	0.550564
0.491128	0.702847	0.582161	0.520466	0.485882	0.46529	0.434126	0.519037
0.396352	0.493808	0.513614	0.374919	0.428507	0.419705	0.484489	0.616699
0.402232	0.50745	0.671456	0.517344	0.455549	0.613881	0.591358	0.69407
0.588293	0.554533	0.716688	0.528525	0.610609	0.397545	0.401182	0.587961
0.385744	0.498867	0.520888	0.435802	0.499723	0.603264	0.402666	0.730132
0.477281	0.520748	0.602553	0.502501	0.530247	0.554528	0.564497	0.572146
0.426178	0.556162	0.506937	0.564849	0.496157	0.438704	0.417006	0.452948
0.498673	0.536261	0.534474	0.578551	0.584912	0.420971	0.435859	0.461662
0.389986	0.588354	0.503835	0.589931	0.428864	0.412813	0.374162	0.408427
0.396649	0.51757	0.441215	0.40025	0.414188	0.479211	0.48451	0.496461
0.486097	0.673416	0.561196	0.553338	0.496303	0.544679	0.599228	0.721855
0.34497	0.604308	0.3653	0.495658	0.448663	0.386061	0.351125	0.551034
0.477819	0.586358	0.659022	0.567505	0.570587	0.380895	0.431425	0.463499
0.394209	0.505066	0.581538	0.468065	0.515655	0.269251	0.382171	0.33041
0.553167	0.672603	0.699689	0.657669	0.519774	0.540091	0.535264	0.536317
0.499511	0.618931	0.503209	0.434866	0.493903	0.521921	0.567681	0.645238
0.467426	0.706775	0.589586	0.635858	0.478194	0.542514	0.534897	0.62208
0.53218	0.647864	0.606535	0.720843	0.52881	0.599772	0.555377	0.634639
0.382458	0.482133	0.457485	0.495363	0.397215	0.467591	0.472872	0.626023
0.38974	0.54641	0.615553	0.562891	0.459446	0.404633	0.468796	0.540162
0.424105	0.3651	0.454186	0.370743	0.490997	0.396916	0.363437	0.441643
0.388196	0.417915	0.444869	0.42328	0.472748	0.366621	0.43543	0.454722
0.394241	0.874691	0.535333	0.77638	0.407185	0.456475	0.482515	0.558637
0.584079	0.606079	0.649346	0.695415	0.570509	0.58413	0.57155	0.5401
0.527508	0.627637	0.609667	0.61797	0.558466	0.547263	0.484591	0.617299
0.469603	0.635266	0.631504	0.556538	0.557356	0.469739	0.421745	0.597429
0.490911	0.559423	0.558714	0.627798	0.534147	0.528487	0.461491	0.597803
0.551577	0.485732	0.640276	0.511581	0.596788	0.595814	0.592268	0.635836
0.444151	0.597546	0.405688	0.591573	0.449798	0.579281	0.559255	0.640483
0.689597	0.76403	0.666977	0.749629	0.639561	0.741579	0.759667	0.736926
0.478741	0.620223	0.619638	0.642952	0.546411	0.61719	0.597846	0.735247
0.466	0.622502	0.732354	0.590582	0.475451	0.445035	0.398755	0.566612
0.430177	0.652357	0.549377	0.58088	0.4113	0.573593	0.510229	0.692494
0.564296	0.604643	0.561922	0.49507	0.608506	0.617854	0.561751	0.777427
0.520391	0.675295	0.64125	0.580935	0.548039	0.471162	0.512337	0.590723
0.427261	0.525499	0.485488	0.461443	0.41446	0.441614	0.429272	0.535931
0.399329	0.63982	0.485785	0.611143	0.393088	0.443209	0.448759	0.474588
0.553836	0.48273	0.565577	0.397874	0.527123	0.479852	0.479871	0.495727
0.396491	0.857622	0.605239	0.598382	0.55575	0.377745	0.409043	0.390724
0.454151	0.6112	0.680306	0.447587	0.524567	0.468205	0.469965	0.498259
0.522796	0.667875	0.555537	0.596688	0.533345	0.561927	0.598655	0.618045
0.292917	0.485675	0.477203	0.405183	0.331876	0.426869	0.442848	0.404965
0.475909	0.615116	0.491493	0.603843	0.486268	0.510771	0.53204	0.534386
0.534617	0.836546	0.471832	0.558593	0.562341	0.539728	0.514113	0.645355
0.558115	0.672689	0.660828	0.6513	0.573517	0.519035	0.575994	0.561381
0.474745	0.630935	0.480539	0.600917	0.507516	0.519149	0.530645	0.557901
0.456217	0.525751	0.713872	0.384794	0.689869	0.602081	0.575403	0.734359
0.374716	0.539607	0.421412	0.491382	0.48962	0.308265	0.331889	0.512761
0.474871	0.745529	0.63966	0.63283	0.544223	0.558888	0.507179	0.621069
0.43914	0.73029	0.514509	0.703148	0.496138	0.389784	0.41552	0.303408
0.625007	0.833092	0.63051	0.703086	0.646373	0.60607	0.646703	0.666073
0.38892	0.499707	0.509825	0.426108	0.420205	0.440423	0.41317	0.591809
0.471132	0.687569	0.682907	0.547415	0.592382	0.590778	0.544618	0.738498
0.465818	0.622886	0.620633	0.565113	0.531182	0.591906	0.473753	0.696976
0.373625	0.531244	0.504849	0.550037	0.457891	0.502631	0.477332	0.525962
0.341254	0.4435	0.515936	0.465199	0.413532	0.472913	0.564029	0.602259
0.484991	0.672011	0.522625	0.672058	0.550353	0.483833	0.426933	0.445007
0.451638	0.517639	0.534097	0.517676	0.508023	0.468528	0.43496	0.516868
0.719183	0.715437	0.702741	0.715487	0.681621	0.728448	0.731031	0.816607
0.334962	0.59197	0.607961	0.452591	0.508214	0.365282	0.304344	0.524719
0.398843	0.491619	0.467351	0.334541	0.468764	0.443658	0.396047	0.530668
0.340253	0.669941	0.628771	0.535662	0.491459	0.513492	0.442995	0.474534
0.450149	0.766646	0.587057	0.600502	0.54834	0.448271	0.492026	0.538753
0.418242	0.51207	0.59554	0.475856	0.479142	0.572284	0.548706	0.583519
0.464605	0.690578	0.51299	0.569196	0.54121	0.600437	0.585062	0.612219
0.467288	0.559223	0.494737	0.448468	0.398088	0.515301	0.460504	0.482259
0.369099	0.648685	0.448828	0.406975	0.42691	0.414556	0.411514	0.433839
0.449315	0.756805	0.497773	0.647574	0.419498	0.57244	0.524002	0.793419
0.505221	0.775022	0.506922	0.713812	0.515097	0.605736	0.621545	0.583226
0.483062	0.78564	0.443393	0.689046	0.494482	0.564107	0.547821	0.589361
0.513832	0.684067	0.720549	0.727197	0.54564	0.507034	0.531784	0.656226
0.453728	0.512477	0.685967	0.461818	0.654106	0.452457	0.454773	0.493941
0.572899	0.529229	0.649064	0.531959	0.627658	0.465122	0.458615	0.535497
0.306958	0.44092	0.448793	0.582728	0.410761	0.426064	0.394793	0.441748
0.498411	0.519504	0.558702	0.559296	0.532448	0.561139	0.574254	0.530771
0.426153	0.634299	0.591975	0.478219	0.491701	0.417239	0.422643	0.482128
0.610223	0.677542	0.595346	0.686863	0.545779	0.770161	0.73112	0.841101
0.651448	0.70974	0.717584	0.728929	0.617748	0.793864	0.795263	0.856727
0.417178	0.760076	0.660425	0.558908	0.548219	0.427682	0.42477	0.446061
0.643853	0.686124	0.65637	0.627997	0.700266	0.589133	0.630944	0.654034
0.386572	0.412146	0.567232	0.420548	0.560642	0.470372	0.488434	0.535545
0.488379	0.683569	0.550069	0.592022	0.523798	0.489626	0.464074	0.565434
0.579412	0.713041	0.668025	0.659931	0.667774	0.554986	0.57436	0.537936
0.436996	0.533377	0.513749	0.621093	0.540502	0.542157	0.57167	0.573616
0.465393	0.498521	0.616518	0.486329	0.544895	0.584722	0.416797	0.665819
0.407555	0.546745	0.708826	0.543449	0.56862	0.368852	0.440715	0.37944
0.312752	0.384166	0.452061	0.481875	0.372315	0.356245	0.428207	0.426073
0.427864	0.543137	0.577476	0.446546	0.404764	0.437613	0.425728	0.554089
0.464312	0.596857	0.563432	0.42185	0.513755	0.497943	0.526602	0.412806
0.535165	0.682767	0.650414	0.566072	0.520506	0.623287	0.613037	0.627536
0.459948	0.581847	0.595103	0.519071	0.374562	0.494727	0.467197	0.50473
0.596333	0.739916	0.654438	0.75	0.65453	0.567285	0.56447	0.531112
0.460768	0.508971	0.608566	0.428938	0.476087	0.434176	0.449894	0.510853
0.429343	0.638504	0.627647	0.603739	0.490017	0.402394	0.396246	0.395101
0.421171	0.382737	0.618913	0.361219	0.53287	0.470979	0.513991	0.608615
0.581943	0.77593	0.506144	0.693451	0.590497	0.483216	0.527178	0.542675
0.496162	0.751793	0.554718	0.664913	0.583865	0.603614	0.611782	0.628826
0.525929	0.704876	0.573768	0.740632	0.585584	0.481938	0.538921	0.511458
0.44068	0.594618	0.660615	0.528394	0.526479	0.444218	0.437365	0.541992
0.427063	0.563515	0.526143	0.501005	0.393102	0.500314	0.453079	0.475414
0.426464	0.758179	0.401725	0.596877	0.492332	0.464974	0.460754	0.54754
0.507346	0.594363	0.678094	0.529209	0.510361	0.562287	0.541231	0.596559
0.414099	0.529162	0.458106	0.432917	0.4866	0.520881	0.504389	0.558555
0.444173	0.46085	0.619795	0.466715	0.609989	0.550617	0.504453	0.647465
0.431339	0.635815	0.487393	0.54821	0.367989	0.534247	0.500553	0.564779
0.430783	0.656488	0.466346	0.656534	0.539125	0.470531	0.43643	0.603446
0.381752	0.701997	0.579462	0.588201	0.486631	0.53306	0.570866	0.670182
0.478326	0.824354	0.441336	0.584331	0.475585	0.485796	0.499604	0.513947
0.455309	0.680089	0.5952	0.674701	0.584856	0.411765	0.344193	0.383039
0.501367	0.770278	0.65704	0.609795	0.625499	0.46236	0.483516	0.566324
0.445963	0.556795	0.578978	0.487283	0.454416	0.469126	0.498099	0.452492
0.437797	0.386014	0.594229	0.34137	0.485344	0.473921	0.421911	0.62791
0.552634	0.496815	0.637806	0.512455	0.61306	0.465419	0.468353	0.496765
0.407592	0.703572	0.551451	0.625764	0.473927	0.381396	0.424564	0.37687
0.54959	0.644377	0.712896	0.578641	0.719943	0.593312	0.59827	0.631809
0.410843	0.517764	0.603395	0.422658	0.435843	0.407852	0.417579	0.613842
0.505629	0.53563	0.718166	0.509181	0.579164	0.611648	0.57464	0.570545
0.477768	0.55964	0.661638	0.462968	0.533944	0.514737	0.563541	0.403481
0.434093	0.756089	0.692934	0.676372	0.492992	0.41082	0.481683	0.407316
0.492737	0.607653	0.526874	0.493656	0.54675	0.411703	0.38395	0.553336
0.429103	0.494803	0.564333	0.45478	0.504153	0.374095	0.420964	0.431598
0.525548	0.640034	0.467458	0.605903	0.504154	0.34544	0.33251	0.342506
0.474759	0.595441	0.455779	0.609422	0.454933	0.438288	0.39333	0.51457
0.473019	0.459393	0.446372	0.526436	0.496347	0.400606	0.412698	0.471409
0.433094	0.352094	0.434226	0.47037	0.414613	0.463411	0.44908	0.657731
0.365951	0.531281	0.321649	0.388761	0.389634	0.473393	0.41929	0.589698
0.593307	0.764648	0.633869	0.581986	0.636009	0.571623	0.516229	0.657904
0.470025	0.608703	0.449347	0.541894	0.450273	0.43037	0.476025	0.345309
0.439707	0.517398	0.557499	0.512641	0.419247	0.43629	0.415759	0.504026
0.374859	0.705586	0.619473	0.522438	0.527699	0.557781	0.497759	0.640603
0.44848	0.528123	0.528756	0.614889	0.461292	0.534075	0.569961	0.552215
0.363389	0.591493	0.482876	0.462989	0.46959	0.424441	0.49807	0.458018
0.584323	0.777152	0.610068	0.646363	0.565885	0.450412	0.438027	0.45947
0.412274	0.458717	0.509128	0.435467	0.439863	0.384682	0.42056	0.391027
0.392804	0.686568	0.558305	0.638115	0.505586	0.399046	0.366983	0.358303
0.419643	0.540748	0.650171	0.456618	0.515245	0.525058	0.55227	0.579286
0.499279	0.584024	0.58329	0.525502	0.541559	0.484853	0.517355	0.625575
0.404392	0.601822	0.540186	0.406482	0.440605	0.478036	0.451264	0.52139
0.371212	0.578032	0.489741	0.455817	0.498579	0.468611	0.470561	0.475495
0.616989	0.831247	0.691681	0.703939	0.644397	0.607189	0.608492	0.711415
0.340934	0.596997	0.448317	0.362048	0.351459	0.480334	0.433962	0.615446
0.457004	0.553629	0.660235	0.551401	0.594522	0.449086	0.439012	0.586427
0.393776	0.668169	0.686938	0.511339	0.445799	0.425448	0.386673	0.552658
0.452883	0.682921	0.606698	0.610847	0.495211	0.512552	0.445916	0.600717
0.523556	0.780004	0.564819	0.665129	0.596339	0.471917	0.503462	0.51187
0.468712	0.725587	0.640606	0.605917	0.524075	0.456113	0.468317	0.552944
0.440329	0.552865	0.672035	0.516339	0.521627	0.487157	0.4382	0.453054
0.369632	0.452145	0.46337	0.391305	0.422042	0.471872	0.43817	0.575782
0.480442	0.725517	0.479979	0.745807	0.512515	0.503057	0.563952	0.546807
0.524541	0.738265	0.594152	0.582727	0.572487	0.513386	0.518636	0.563977
0.355256	0.522699	0.506754	0.356536	0.486278	0.608682	0.682381	0.648637
0.456383	0.766474	0.673104	0.710748	0.544073	0.494274	0.598291	0.385059
0.41049	0.615379	0.618057	0.562912	0.524886	0.534119	0.577478	0.463152
0.461621	0.596258	0.526392	0.61063	0.505363	0.504202	0.540593	0.576755
0.497817	0.692536	0.625973	0.663855	0.564321	0.501279	0.497163	0.573291
0.616178	0.701014	0.68204	0.700749	0.633343	0.427034	0.444006	0.500318
0.546236	0.648608	0.718373	0.603727	0.582449	0.448631	0.423764	0.490522
0.397656	0.670812	0.577666	0.554281	0.461408	0.377989	0.397558	0.518732
0.366923	0.535666	0.566159	0.417371	0.441354	0.437091	0.442263	0.433679
0.446542	0.566081	0.632082	0.566885	0.56332	0.391689	0.512995	0.502687
0.410514	0.638506	0.662845	0.579966	0.524169	0.420356	0.483641	0.359722
0.435531	0.551177	0.545616	0.541331	0.483807	0.48376	0.509695	0.55351
0.378953	0.614471	0.399366	0.482966	0.360357	0.477805	0.445755	0.495777
0.42768	0.622483	0.532791	0.574893	0.435085	0.386975	0.394313	0.425068
0.402448	0.501142	0.463426	0.538035	0.443929	0.426092	0.416418	0.42483
0.440147	0.603825	0.705348	0.519274	0.550397	0.508618	0.471992	0.597784
0.480991	0.564409	0.64111	0.596026	0.545788	0.500219	0.464395	0.681573
0.410424	0.510081	0.458694	0.567941	0.541754	0.54553	0.579148	0.571948
0.424243	0.541588	0.503222	0.480252	0.445551	0.527204	0.50011	0.525049
0.403151	0.709499	0.502552	0.668364	0.427232	0.327827	0.380723	0.35908
0.579794	0.755246	0.595074	0.662613	0.613227	0.544634	0.532532	0.5827
0.508121	0.653581	0.711951	0.610894	0.597697	0.536905	0.446911	0.581835
0.513855	0.565473	0.571076	0.565513	0.514798	0.419274	0.432888	0.474816
0.431623	0.60105	0.623027	0.487141	0.482947	0.395384	0.482777	0.439531
0.451841	0.515627	0.615247	0.513893	0.477901	0.334417	0.3745	0.341663
0.347307	0.715792	0.43883	0.625053	0.388859	0.452955	0.550007	0.488393
0.543367	0.568024	0.645466	0.51324	0.573842	0.434394	0.415778	0.472776
0.356312	0.63888	0.561831	0.600741	0.410047	0.426955	0.44239	0.449507
0.391348	0.598249	0.624154	0.54907	0.444978	0.551799	0.567031	0.574679
0.47423	0.606953	0.470269	0.490501	0.499031	0.378882	0.422899	0.698016
0.31211	0.49542	0.333842	0.456584	0.249862	0.478461	0.424114	0.547471
0.382107	0.431313	0.57034	0.488054	0.440388	0.396907	0.396461	0.448088
0.518192	0.535221	0.585879	0.58112	0.490783	0.471889	0.49331	0.530307
0.307495	0.571844	0.737765	0.460766	0.437716	0.47968	0.495715	0.618769
0.480228	0.585274	0.416987	0.605031	0.494003	0.480683	0.437411	0.488293
0.534472	0.655407	0.487869	0.546764	0.475224	0.532051	0.493998	0.528233
0.377291	0.408011	0.624709	0.49646	0.510864	0.598872	0.530919	0.60454
0.348554	0.57032	0.468193	0.57036	0.356882	0.496362	0.466445	0.59534
0.370379	0.74464	0.445904	0.597054	0.394913	0.456893	0.51063	0.51839
0.42439	0.339111	0.633503	0.398475	0.578308	0.477579	0.413517	0.568764
0.538737	0.581992	0.533935	0.577368	0.463611	0.550687	0.539336	0.570914
0.386632	0.675661	0.469584	0.458469	0.416889	0.510683	0.496544	0.570441
0.3914	0.654313	0.544879	0.537349	0.497503	0.488919	0.4717	0.551755
0.37083	0.62221	0.557011	0.56225	0.47588	0.41982	0.430018	0.393065
0.512678	0.715736	0.621928	0.649763	0.543297	0.452947	0.469608	0.485026
0.486738	0.607228	0.490682	0.620146	0.484904	0.475088	0.42269	0.517418
0.554158	0.76355	0.588547	0.665873	0.616563	0.506041	0.496347	0.613373
0.405858	0.516615	0.483562	0.466519	0.429933	0.387312	0.326577	0.601437
0.494102	0.656604	0.662402	0.632362	0.512522	0.520463	0.426892	0.623368
0.386203	0.756581	0.531442	0.573155	0.497461	0.516598	0.532856	0.603981
0.456837	0.655967	0.647702	0.495509	0.537623	0.439464	0.389801	0.458309
0.426043	0.568679	0.622191	0.553599	0.522857	0.486304	0.455832	0.478425
0.443535	0.633938	0.645763	0.548439	0.550675	0.496634	0.506474	0.484085
0.444381	0.686107	0.51476	0.624706	0.455167	0.456664	0.381551	0.607027
0.638292	0.721109	0.743243	0.620328	0.668579	0.592264	0.62604	0.698469
0.497858	0.522122	0.647953	0.546323	0.555324	0.435555	0.491417	0.509647
0.491277	0.536077	0.634731	0.496853	0.569715	0.47486	0.454569	0.470698
0.445616	0.50116	0.536184	0.472122	0.402462	0.498587	0.451364	0.54991
0.451347	0.623811	0.554194	0.532778	0.530132	0.463222	0.434336	0.576181
0.328006	0.463642	0.56208	0.463674	0.516618	0.477216	0.50754	0.470048
0.470622	0.465249	0.495201	0.513442	0.511466	0.444226	0.518803	0.451108
0.487971	0.513952	0.533954	0.454718	0.501108	0.569123	0.489229	0.676707
0.445776	0.596229	0.600275	0.628779	0.430525	0.478383	0.50936	0.58006
0.531034	0.783116	0.524859	0.694839	0.480037	0.536637	0.509169	0.533802
0.371711	0.442962	0.564422	0.350434	0.395234	0.393792	0.402722	0.67771
0.385926	0.467786	0.530574	0.368614	0.525175	0.306775	0.376497	0.331425
0.428545	0.490645	0.600744	0.487505	0.440203	0.549332	0.565225	0.583484
0.455523	0.591919	0.587067	0.59196	0.481466	0.49692	0.454039	0.415912
0.41927	0.68411	0.532345	0.614889	0.483227	0.388322	0.443492	0.291718
0.593504	0.757418	0.727314	0.648211	0.64214	0.552824	0.512871	0.645223
0.488958	0.699717	0.516808	0.65275	0.510167	0.509529	0.529547	0.523631
0.500363	0.60479	0.522785	0.479009	0.482449	0.451103	0.529055	0.564462
0.392088	0.634636	0.532198	0.670728	0.449651	0.60639	0.512383	0.648923
0.480505	0.719177	0.678335	0.615426	0.568915	0.50893	0.502271	0.632215
0.251669	0.469618	0.419462	0.393471	0.25735	0.407534	0.317845	0.520084
0.435948	0.773108	0.492069	0.609705	0.315561	0.568099	0.526285	0.616536
0.456156	0.707515	0.556162	0.586796	0.605371	0.533226	0.509711	0.495496
0.497505	0.708595	0.605059	0.588533	0.55975	0.470021	0.524587	0.486618
0.384811	0.524655	0.506499	0.475737	0.438141	0.462863	0.365117	0.678133
0.333799	0.543908	0.322007	0.475226	0.323765	0.429167	0.393064	0.666495
0.531848	0.804977	0.562202	0.788806	0.605516	0.571292	0.586734	0.698305
0.473138	0.828596	0.561025	0.551394	0.471987	0.507804	0.489138	0.611253
0.507702	0.713892	0.489593	0.640145	0.606003	0.57584	0.58463	0.592585
0.466796	0.655735	0.52173	0.475999	0.501116	0.361595	0.372314	0.378885
0.389213	0.691726	0.577766	0.66624	0.46867	0.386984	0.358158	0.458611
0.423777	0.702023	0.599965	0.606837	0.51853	0.456714	0.409914	0.551023
0.402824	0.428976	0.532108	0.411877	0.490083	0.471546	0.391248	0.526795
0.470055	0.521468	0.638744	0.43707	0.558883	0.588245	0.629648	0.61868
0.528543	0.784256	0.621846	0.562971	0.593421	0.465674	0.479703	0.503354
0.406977	0.620761	0.571264	0.572147	0.474862	0.477006	0.416974	0.685458
0.503369	0.814405	0.537555	0.698958	0.497441	0.506934	0.495564	0.609396
0.502095	0.76501	0.4641	0.595585	0.472887	0.44762	0.402846	0.598631
0.342774	0.487413	0.434911	0.329703	0.36445	0.425511	0.385486	0.412203
0.397775	0.672058	0.407491	0.539768	0.404394	0.487096	0.432052	0.553882
0.535844	0.665699	0.597884	0.610052	0.543743	0.43804	0.453154	0.635891
0.491556	0.8006	0.55152	0.709843	0.439221	0.54228	0.596565	0.553899
0.382675	0.432929	0.470776	0.460555	0.430755	0.464998	0.430569	0.504176
0.457025	0.449541	0.63818	0.443215	0.530031	0.435214	0.500301	0.411589
0.499922	0.606775	0.507564	0.491479	0.484716	0.451778	0.451848	0.646324
0.381711	0.587298	0.461659	0.46139	0.495665	0.443882	0.410473	0.512612
0.411674	0.666778	0.617068	0.650973	0.595336	0.452804	0.383394	0.433576
0.378051	0.614415	0.552094	0.449464	0.415038	0.422684	0.434789	0.703043
0.421937	0.702698	0.474917	0.544727	0.462876	0.565066	0.530871	0.64694
0.312116	0.472116	0.371345	0.305645	0.337589	0.426971	0.437754	0.52179
0.448915	0.472176	0.615727	0.472209	0.53884	0.439346	0.38281	0.493481
0.516542	0.661914	0.664785	0.66196	0.50947	0.506365	0.473604	0.619222
0.479637	0.516796	0.437664	0.516833	0.476771	0.447294	0.437696	0.457292
0.530264	0.657309	0.639535	0.490187	0.573413	0.31412	0.299469	0.401002
0.522269	0.663137	0.583447	0.678087	0.507552	0.72653	0.788643	0.691754
0.564058	0.763857	0.533152	0.673707	0.530899	0.728224	0.710246	0.765674
0.443465	0.663509	0.506756	0.531898	0.481091	0.414342	0.397925	0.488471
0.452507	0.447843	0.591682	0.485871	0.477799	0.490207	0.529705	0.507288
0.480803	0.671876	0.627724	0.565539	0.569447	0.494362	0.46102	0.574066
0.568188	0.842359	0.746313	0.752702	0.635152	0.607264	0.626654	0.669893
0.392428	0.583251	0.548112	0.571572	0.410571	0.499275	0.523392	0.557459
0.528879	0.768201	0.658084	0.644187	0.60771	0.479196	0.504973	0.523707
0.468507	0.53593	0.777315	0.504495	0.564195	0.51742	0.446526	0.530816
0.473682	0.448937	0.556016	0.427183	0.543163	0.416654	0.485547	0.57325
0.487076	0.559328	0.717628	0.501145	0.576214	0.389907	0.463779	0.362866
0.47699	0.588599	0.665092	0.597473	0.556758	0.609172	0.49149	0.731321
0.403742	0.552061	0.664539	0.602347	0.565588	0.429851	0.435827	0.657049
0.434862	0.645232	0.478953	0.575119	0.455983	0.469295	0.459512	0.490823
0.395942	0.706835	0.531894	0.546002	0.445937	0.457295	0.46043	0.573864
0.478658	0.537135	0.633317	0.579638	0.604511	0.503177	0.466681	0.4984
0.619149	0.67259	0.679649	0.654621	0.599773	0.602663	0.571669	0.704816
0.377741	0.565055	0.503842	0.482286	0.393406	0.441252	0.518172	0.478509
0.546408	0.630567	0.731244	0.618721	0.651681	0.576054	0.598469	0.769603
0.445001	0.716404	0.551744	0.635365	0.505342	0.480939	0.402775	0.557539
0.461314	0.508385	0.759215	0.508421	0.635554	0.643824	0.626526	0.692236
0.530036	0.576323	0.599807	0.618255	0.573579	0.549754	0.513246	0.507044
0.489942	0.605538	0.546598	0.534828	0.484395	0.498653	0.518399	0.475812
0.31211	0.499407	0.432152	0.344689	0.327199	0.438341	0.441	0.586632
0.452172	0.552988	0.714464	0.476402	0.534463	0.509474	0.418746	0.606011
0.325341	0.548694	0.350872	0.428639	0.434356	0.403775	0.440646	0.48955
0.35998	0.508378	0.492643	0.414453	0.346875	0.35321	0.399507	0.430946
0.450544	0.763376	0.589385	0.555952	0.479412	0.51563	0.458534	0.632679
0.480156	0.471751	0.570059	0.550764	0.508893	0.520078	0.561941	0.569703
0.451632	0.527074	0.714421	0.554492	0.450167	0.434022	0.397099	0.497264
0.435301	0.569765	0.431022	0.468156	0.439871	0.470517	0.371333	0.595013
0.413271	0.638804	0.469961	0.524685	0.484243	0.525293	0.510338	0.529067
0.481592	0.640174	0.626423	0.579725	0.608971	0.400994	0.406204	0.506535
0.424916	0.675003	0.702307	0.557522	0.554457	0.519586	0.555422	0.59565
0.459945	0.622645	0.584654	0.463423	0.523954	0.459563	0.502488	0.484332
0.389898	0.547169	0.535885	0.336089	0.443854	0.364607	0.326401	0.510351
0.439806	0.556753	0.630743	0.397026	0.618071	0.483673	0.438948	0.616575
